# Supplementary material
Source: PubMed Central journal article supplement (PMC7609766)
Supplement: 41422_2020_363_MOESM3_ESM.pdf [file 41422_2020_363_MOESM3_ESM.pdf]

**Supplementary information, Table. S2| Information of the EBV proteins involved  
in the formation of the capsid**

| <b>Protein name<br/>in EBV</b> | <b>Common name in<br/>herpesviruses</b> | <b>length</b> |
|--------------------------------|-----------------------------------------|---------------|
| BcLF1                          | Major capsid protein<br>(MCP)           | 1382          |
| BFRF3                          | Small capsid protein<br>(SCP)           | 177           |
| BORF1                          | Triplex monomer (Tri1)                  | 364           |
| BDLF1                          | Triplex dimer (Tri2)                    | 301           |
| BBRF1                          | Portal protein                          | 614           |
| BVRF1                          | } CATC                                  | 571           |
| BPLF1                          |                                         | 3149          |
| BGLF1                          |                                         | 508           |
