# Supplementary material
Source: PubMed Central journal article supplement (PMC7609766)
Supplement: 41422_2020_363_MOESM4_ESM.pdf [file 41422_2020_363_MOESM4_ESM.pdf]

**a**

Before detergent treated

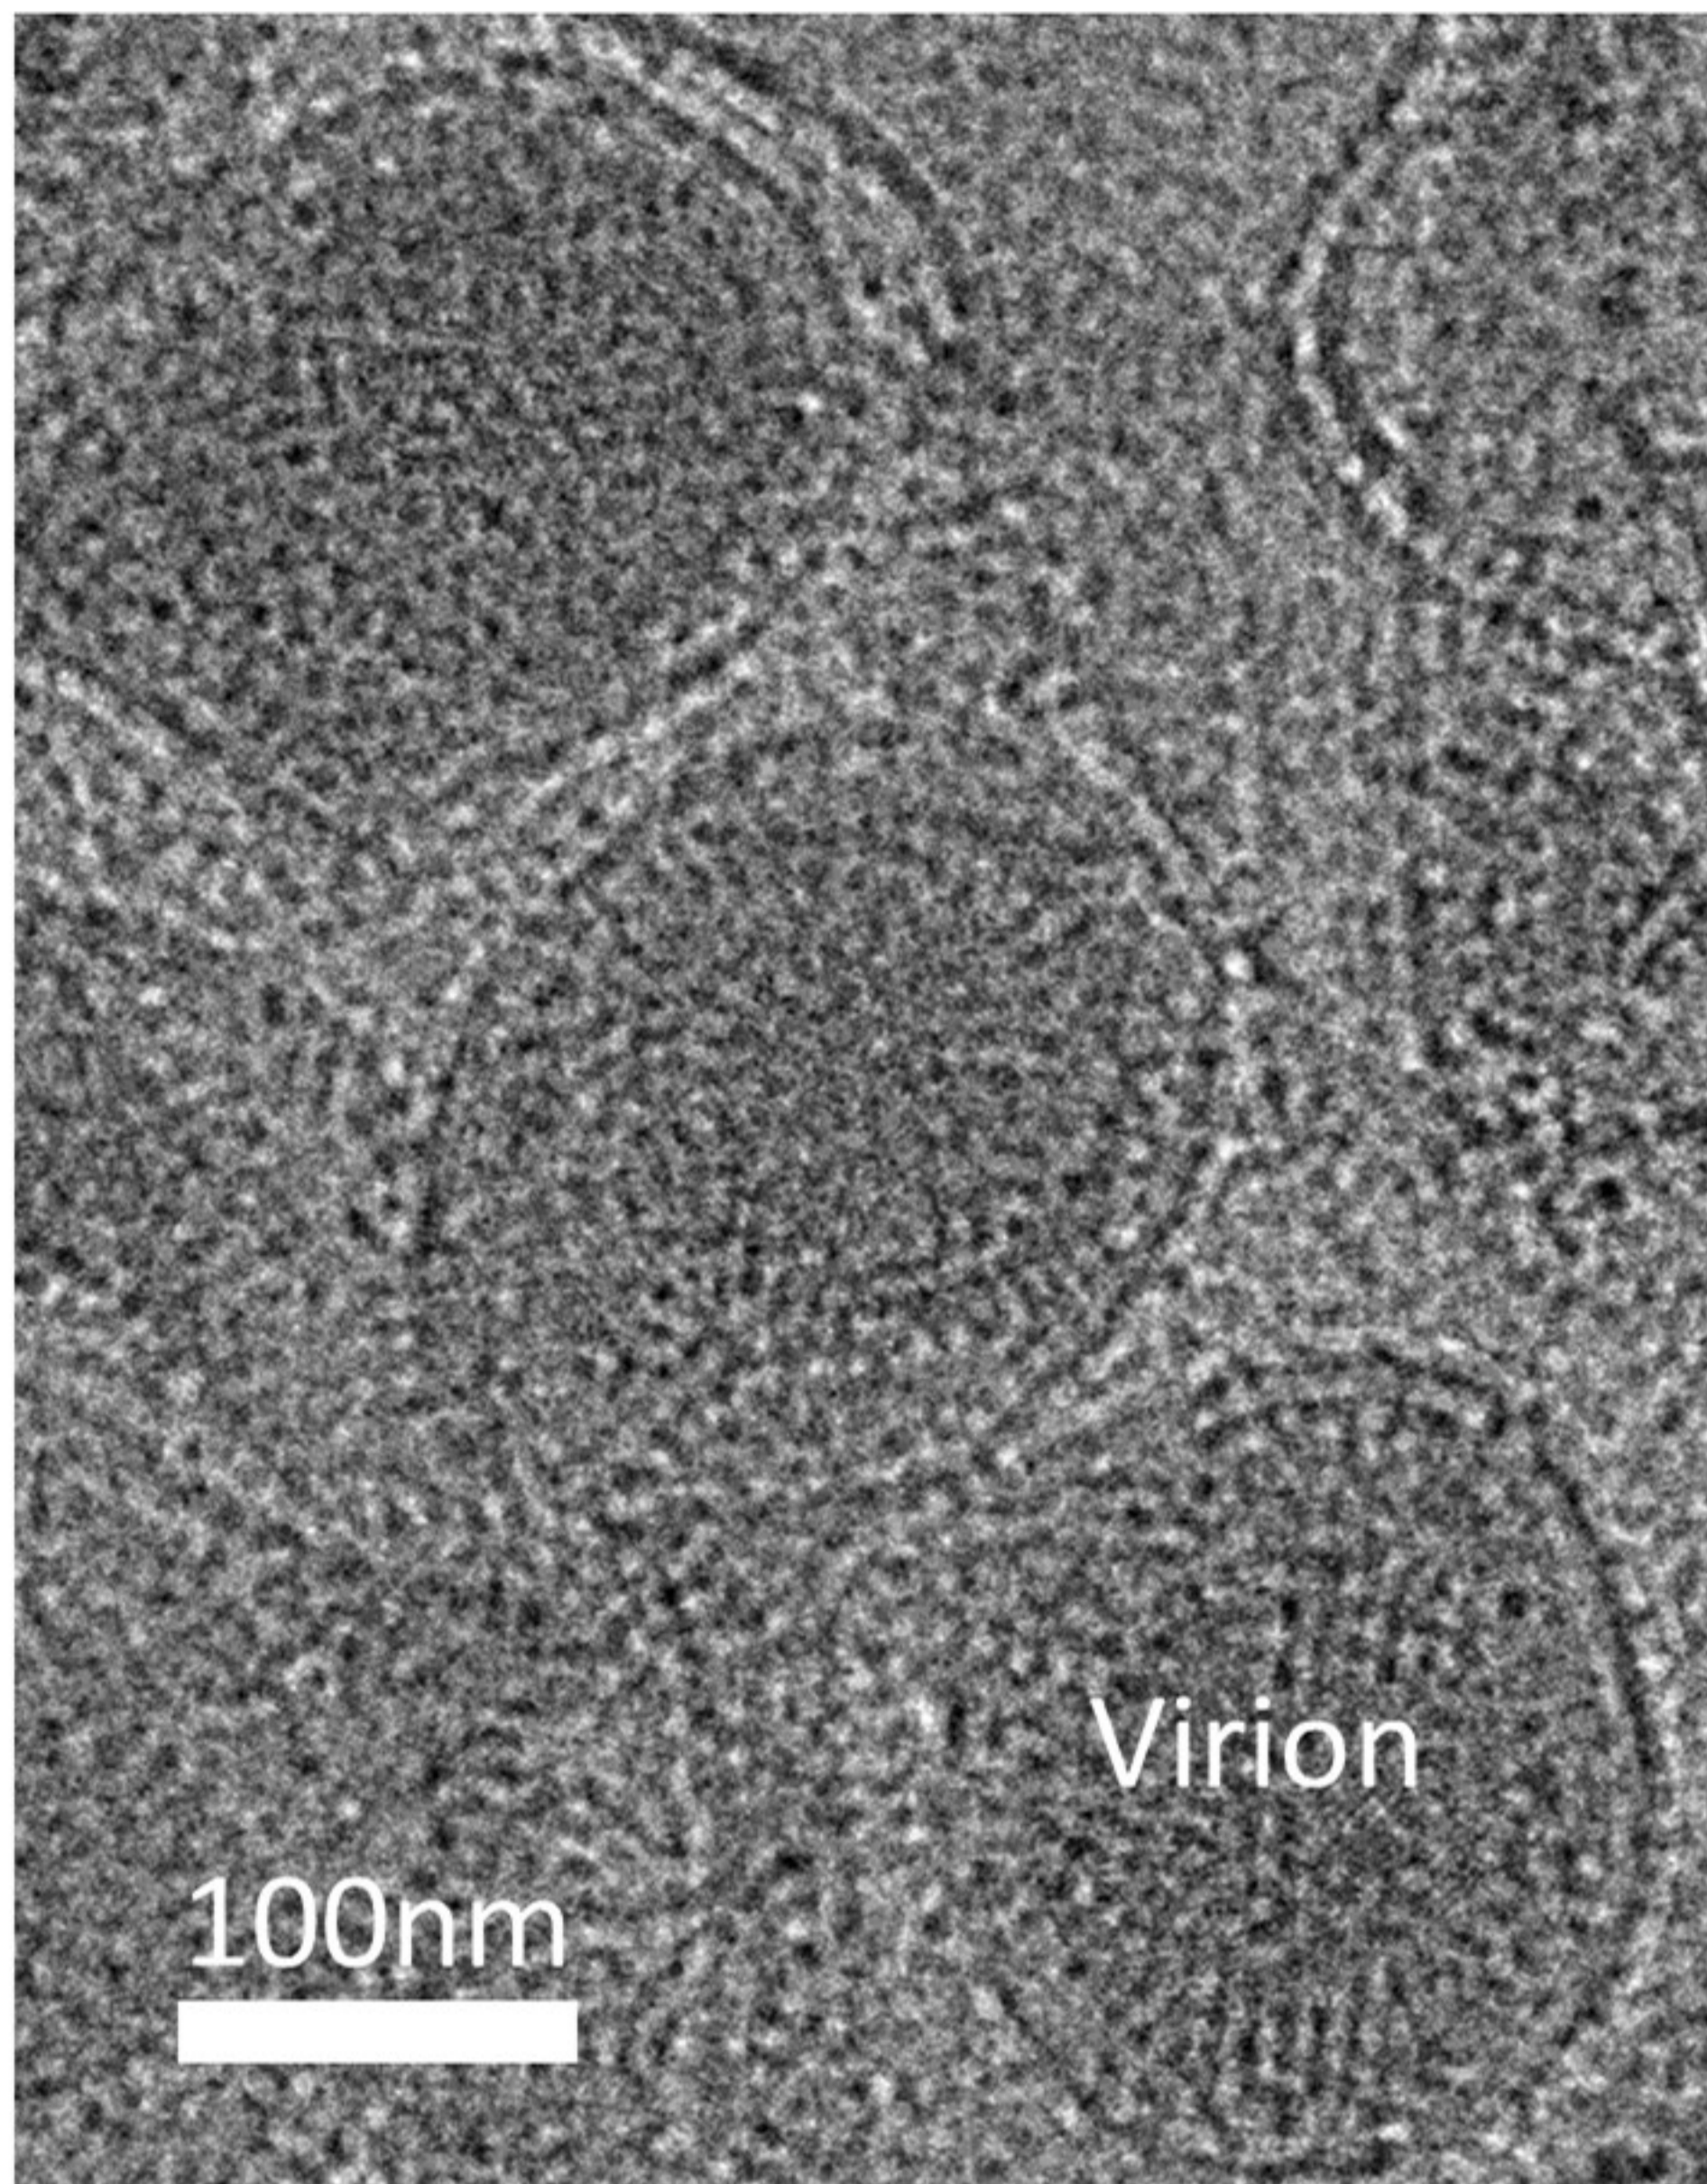

**b**

Treated with 0.8% Tween-100

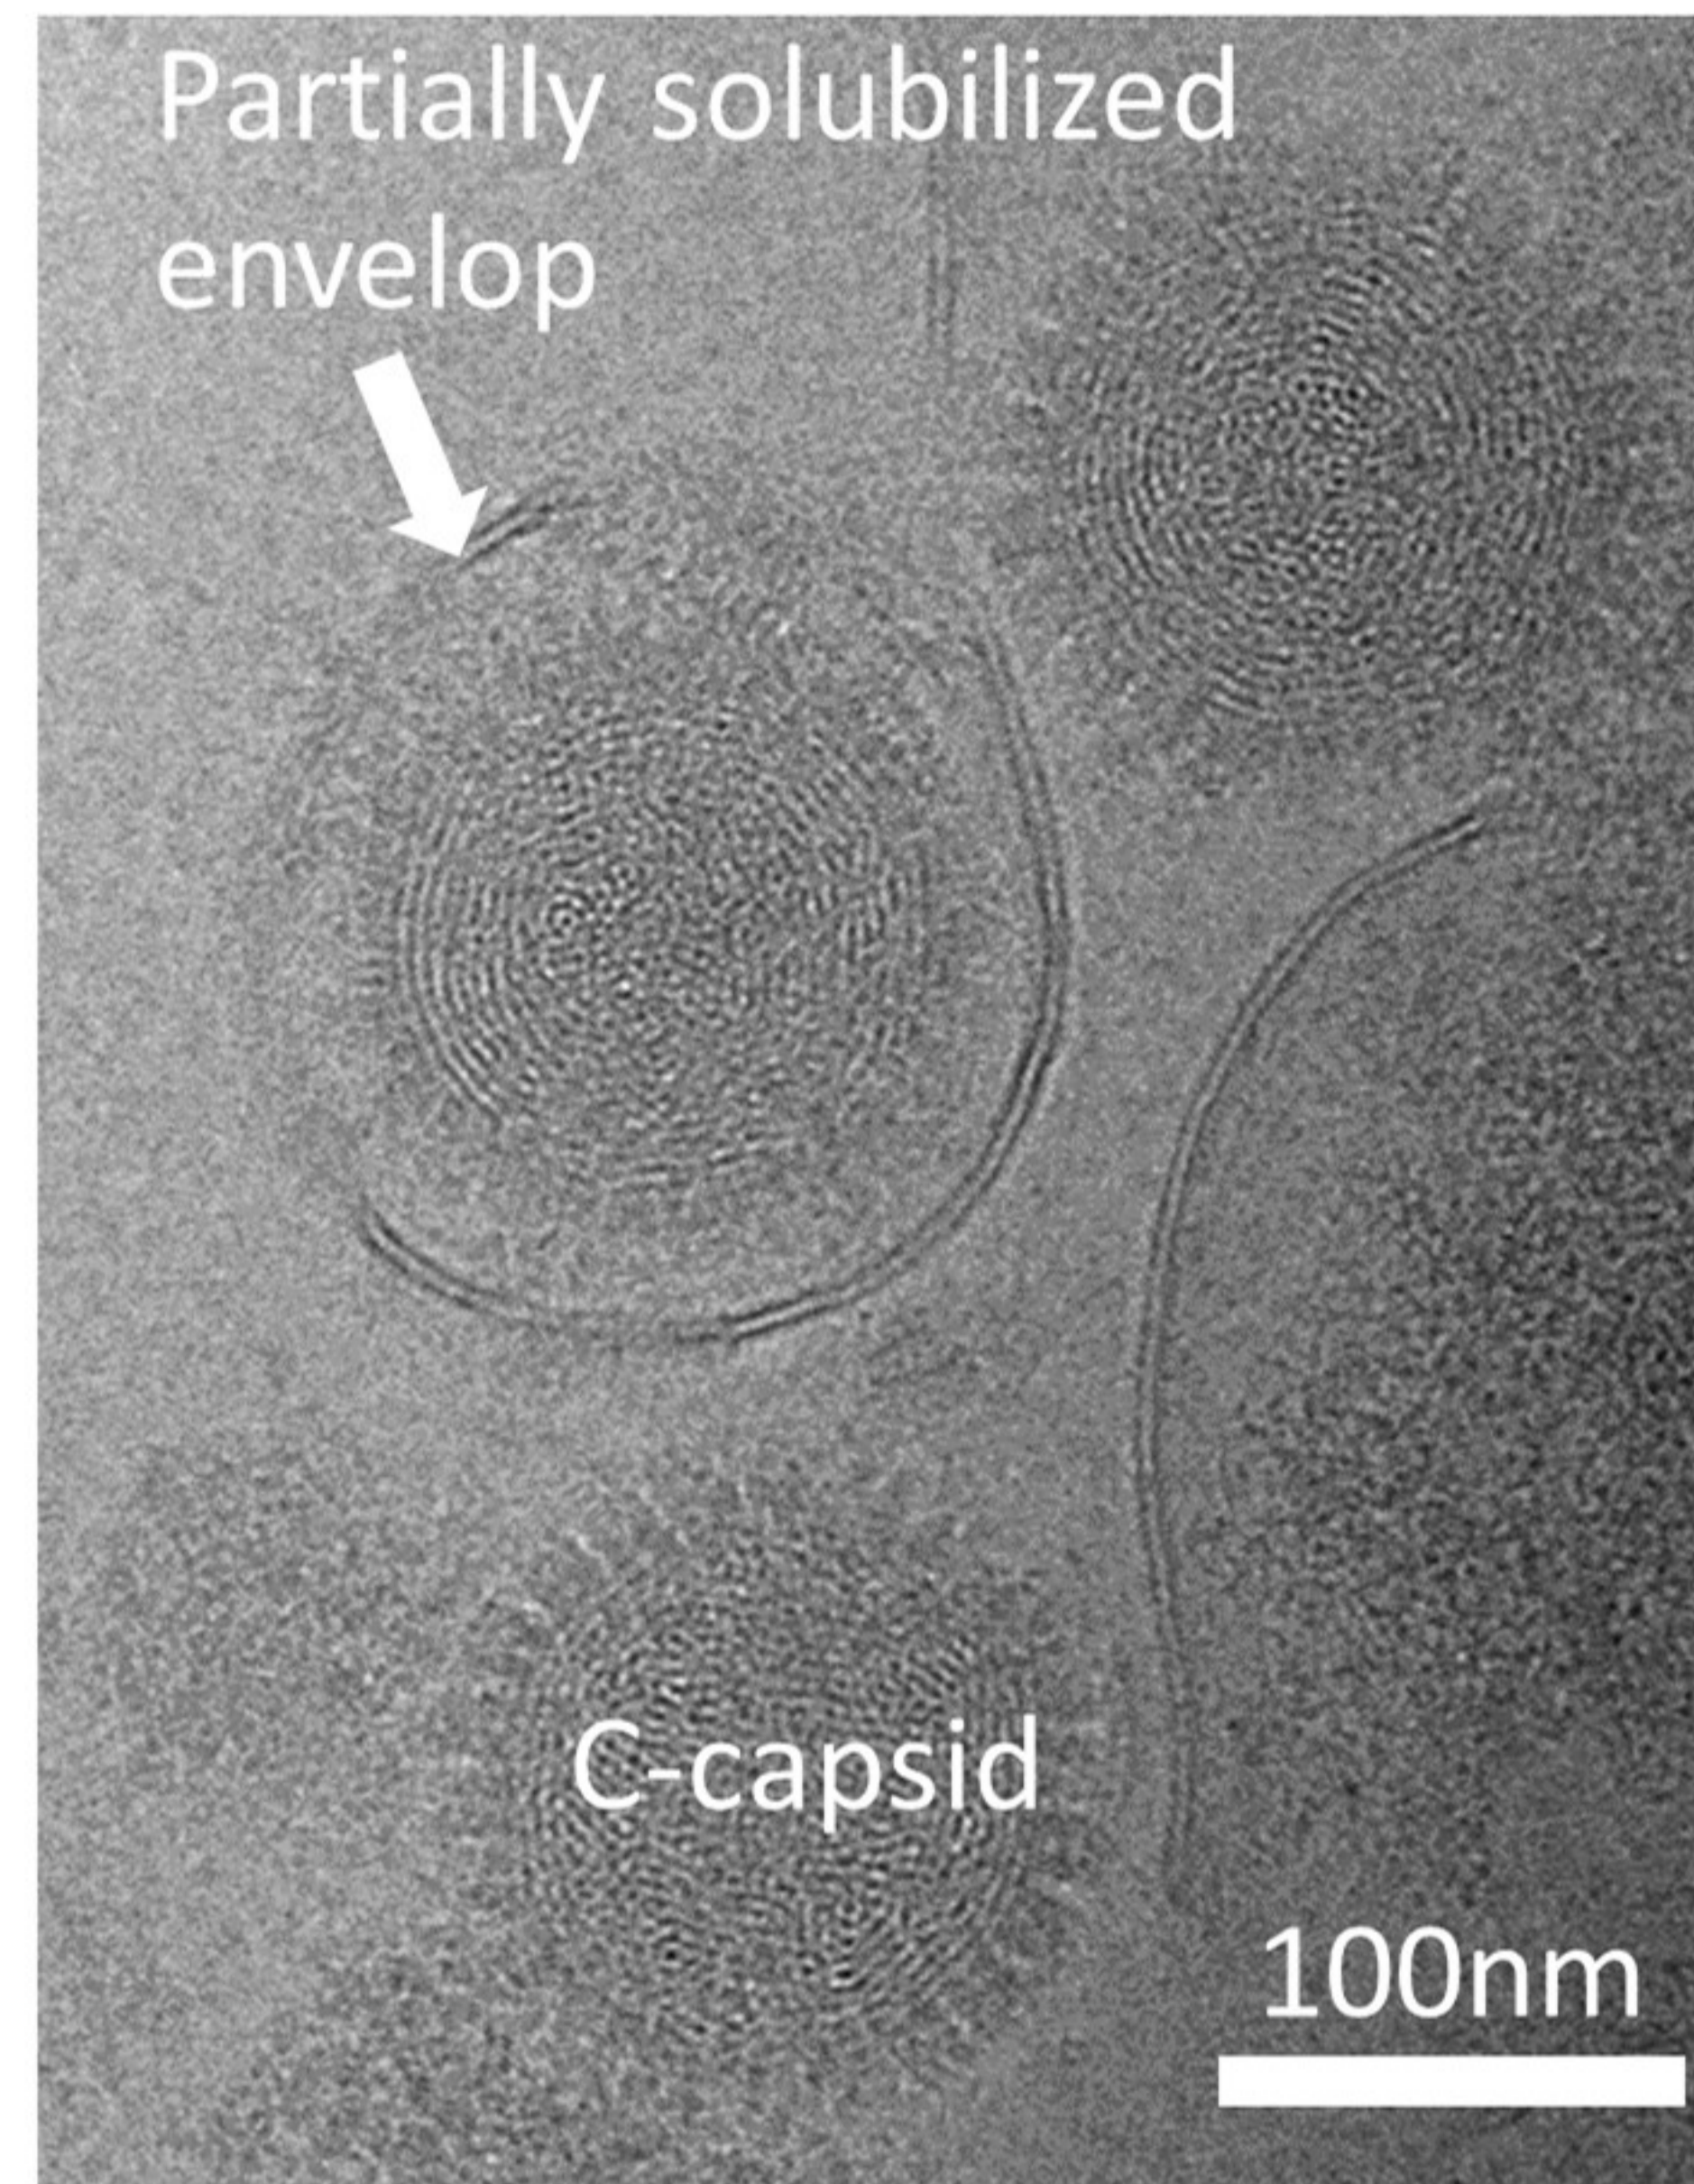

**Supplementary information, Fig. S1| CryoEM micrographs of EBV virion.**

**a** A representative image recorded with a 200 kV Talos Arctica microscope, showing intact EBV virions before the detergent treatment.

**b** A representative image recorded with 300 kV Titan Krios microscope, showing that the viral envelopes were removed or partially solubilized by detergent treatment.
