# Supplementary material
Source: PubMed Central journal article supplement (PMC7609766)
Supplement: 41422_2020_363_MOESM5_ESM.pdf [file 41422_2020_363_MOESM5_ESM.pdf]

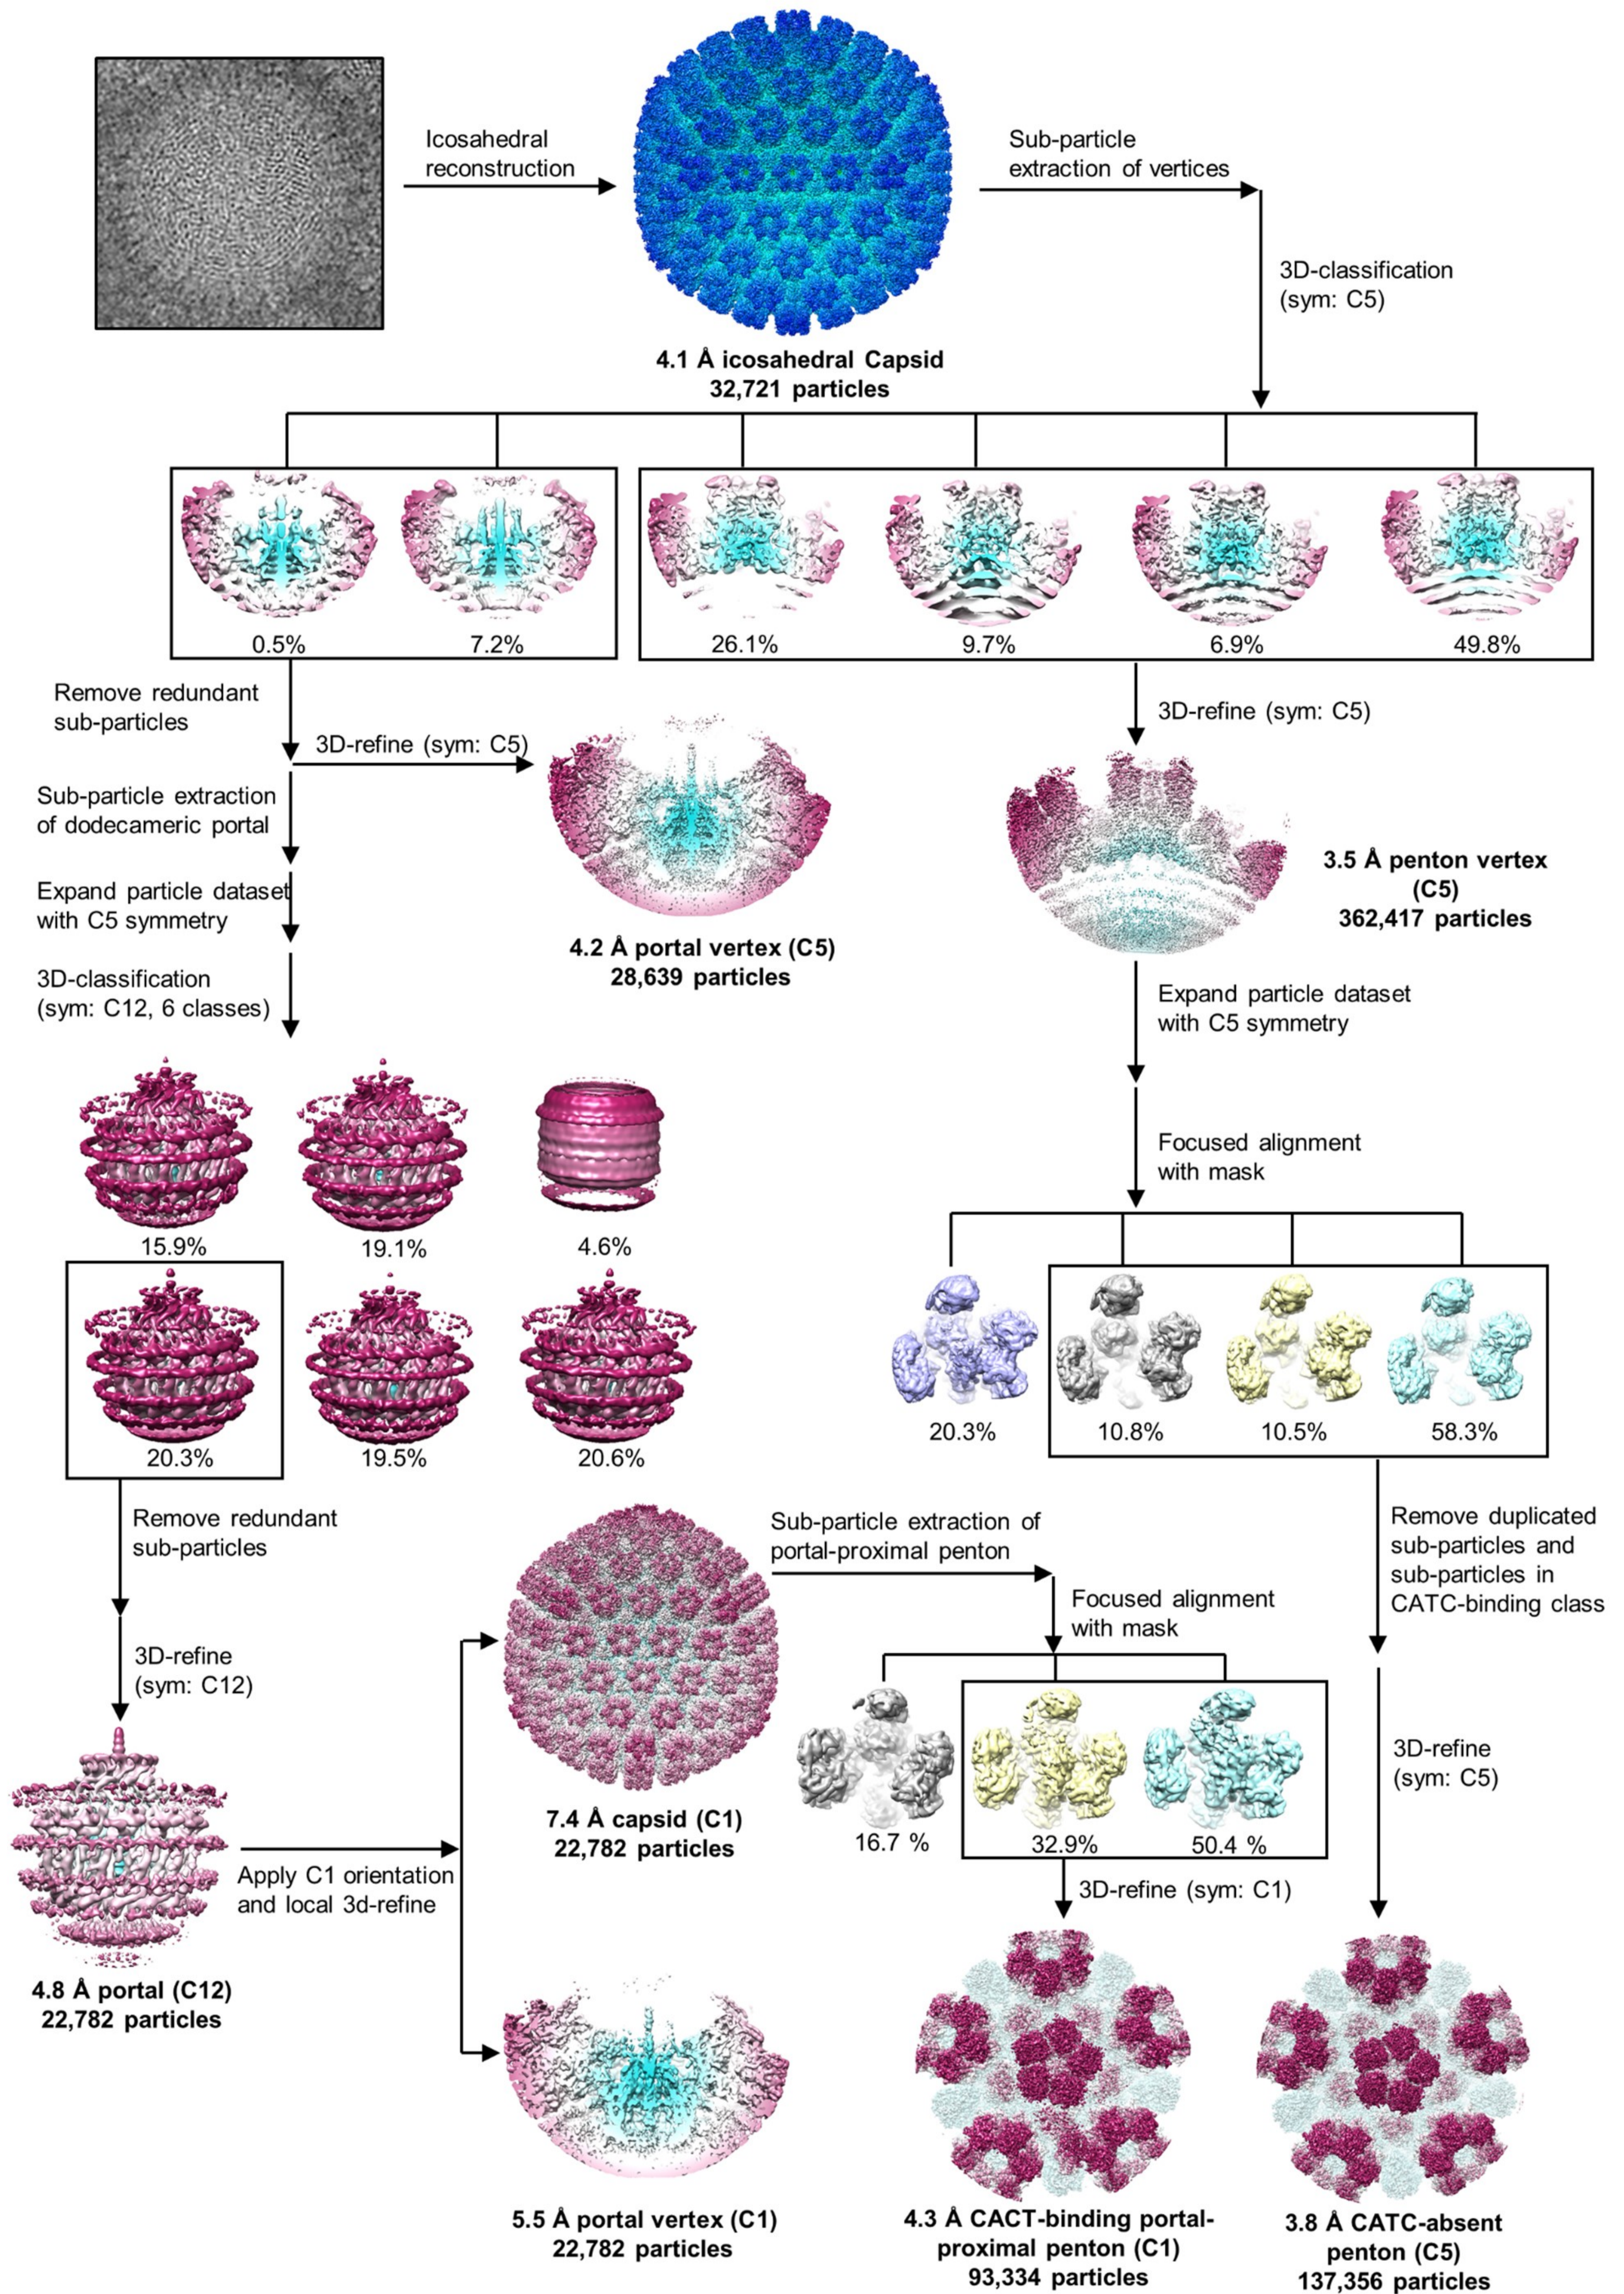

**Supplementary information, Fig. S2| Icosahedral reconstruction of EBV capsid and sequential 3D classification and refinement of sub-particles.**
