# Supplementary material
Source: PubMed Central journal article supplement (PMC7609766)
Supplement: 41422_2020_363_MOESM7_ESM.pdf [file 41422_2020_363_MOESM7_ESM.pdf]

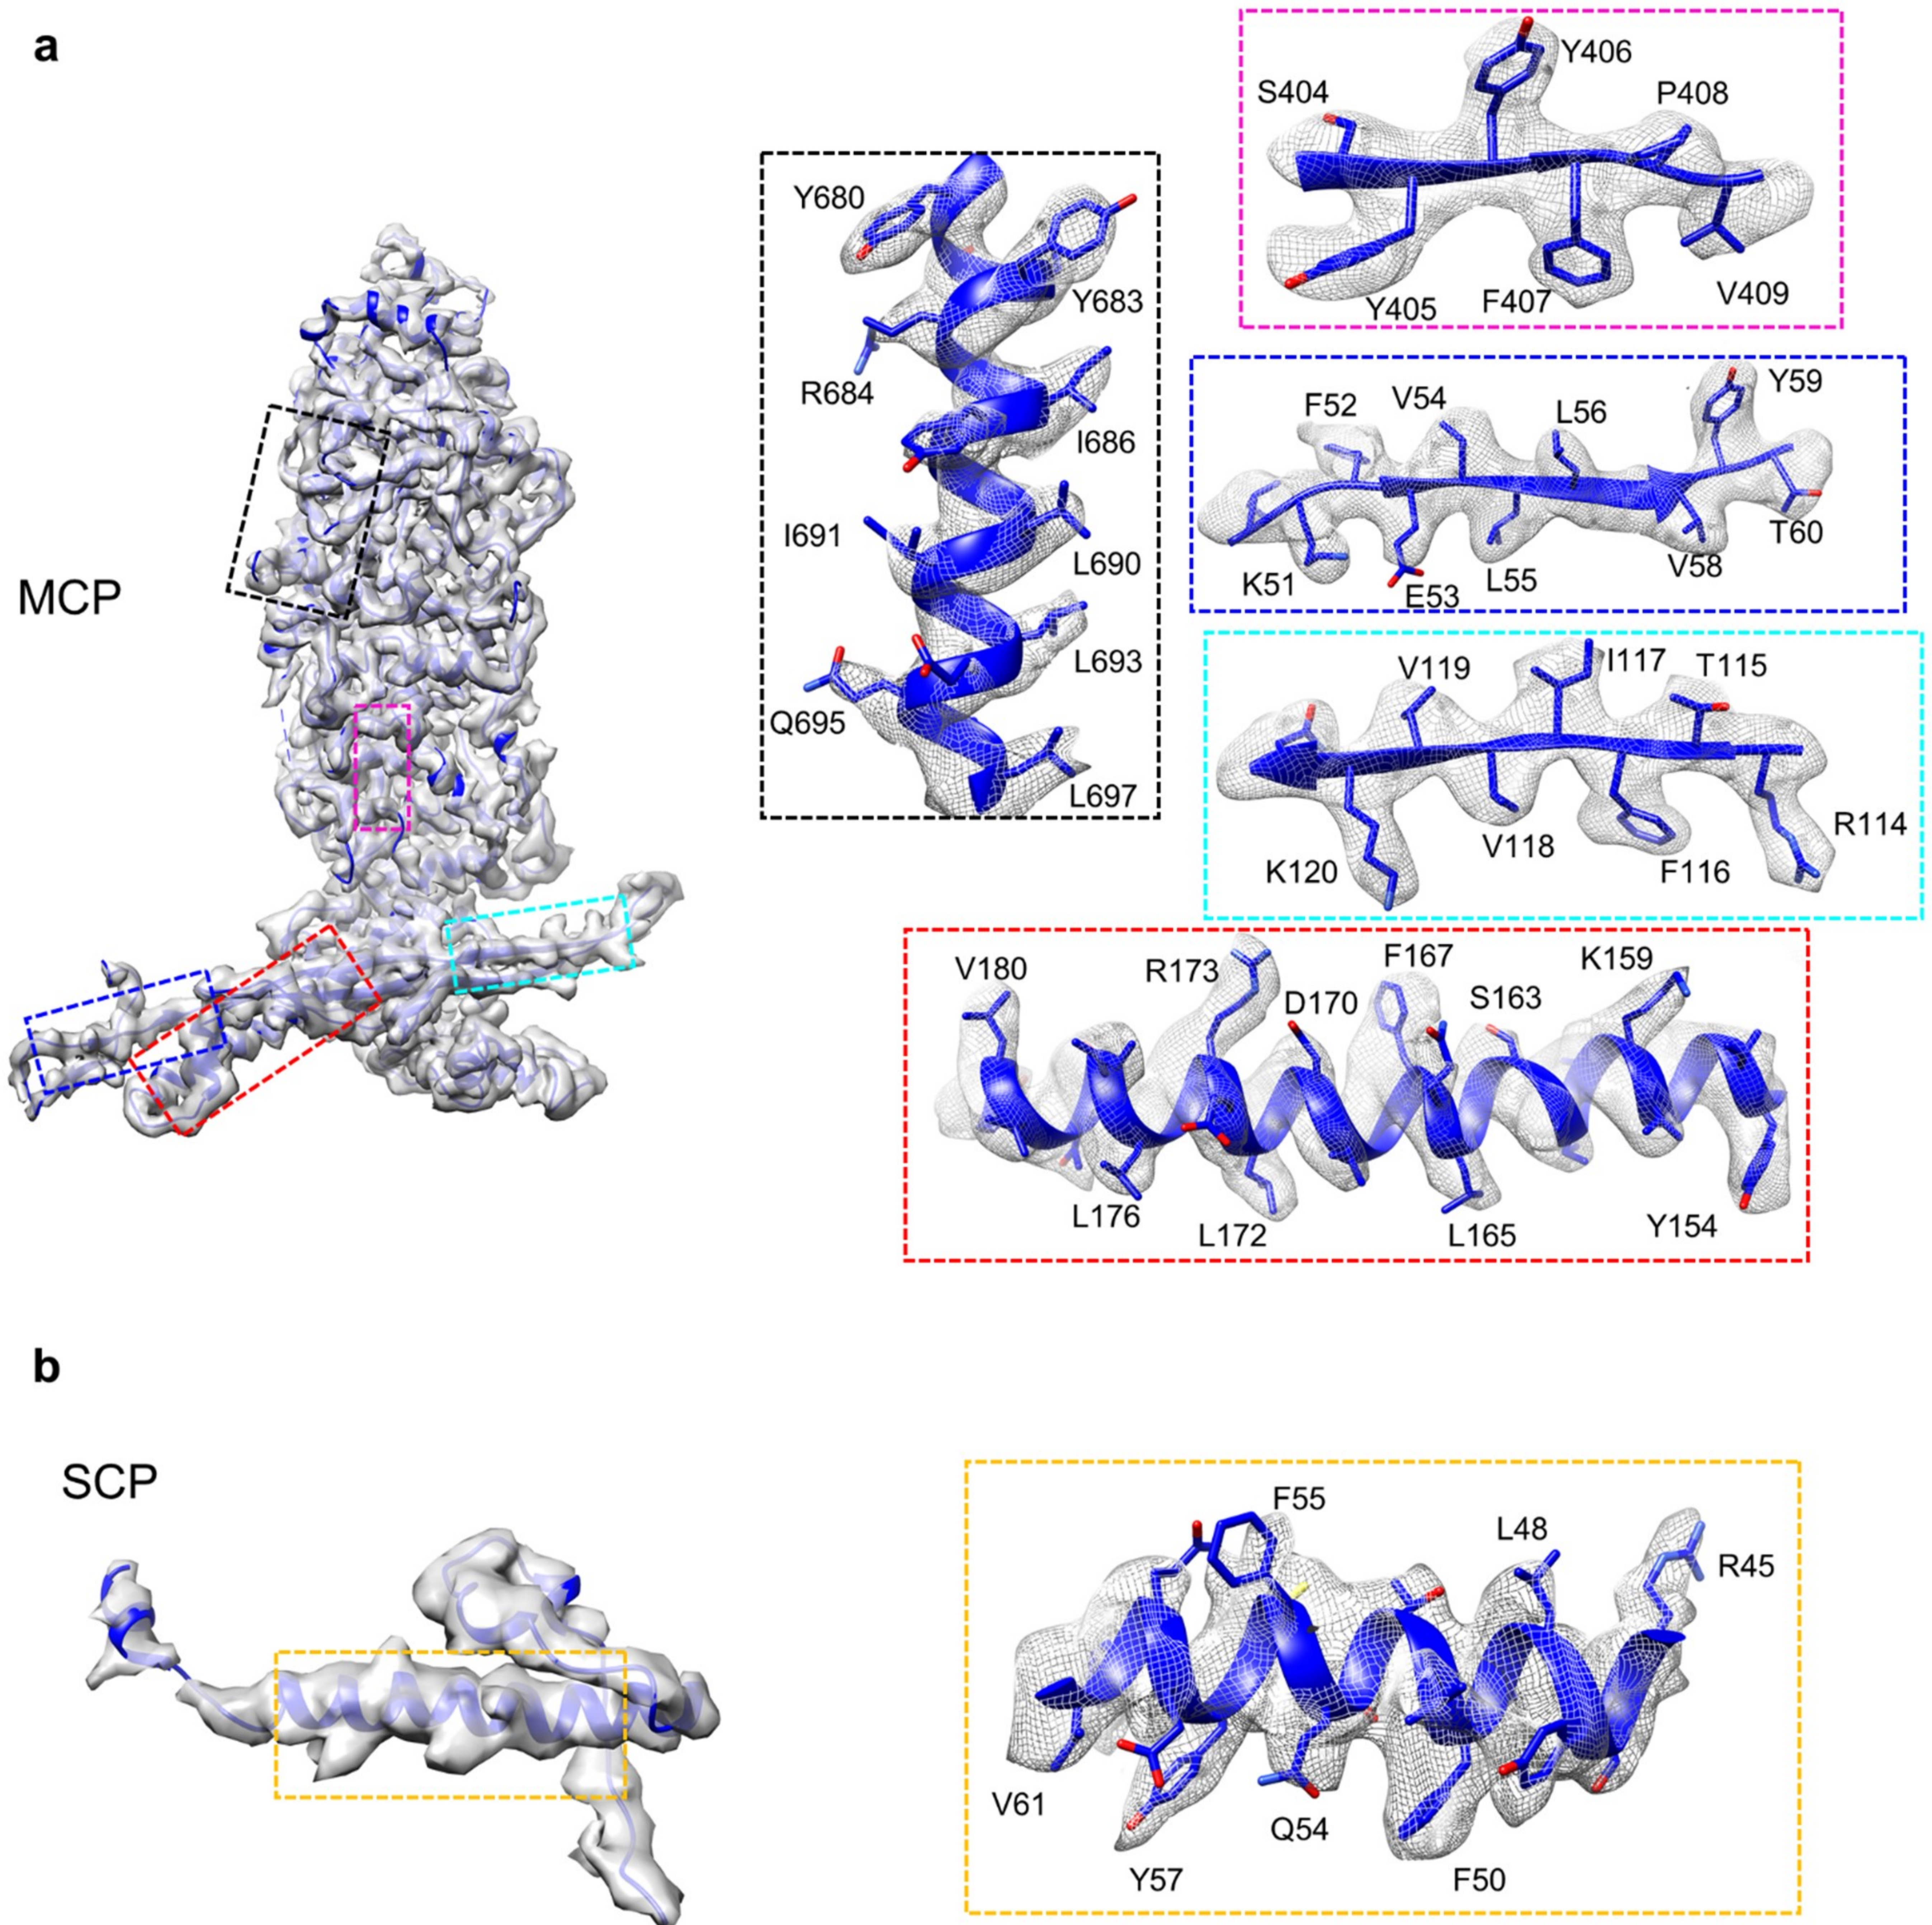

**Supplementary information, Fig. S4| Density maps and atomic models of MCP (a) and SCP (b)**

The densities were segmented out from the 3.5 Å resolution reconstruction of the penton vertex. The insets are zoomed-in views of the boxed regions to illustrate the side-chain features in the density map.
