# Supplementary material
Source: PubMed Central journal article supplement (PMC7609766)
Supplement: 41422_2020_363_MOESM8_ESM.pdf [file 41422_2020_363_MOESM8_ESM.pdf]

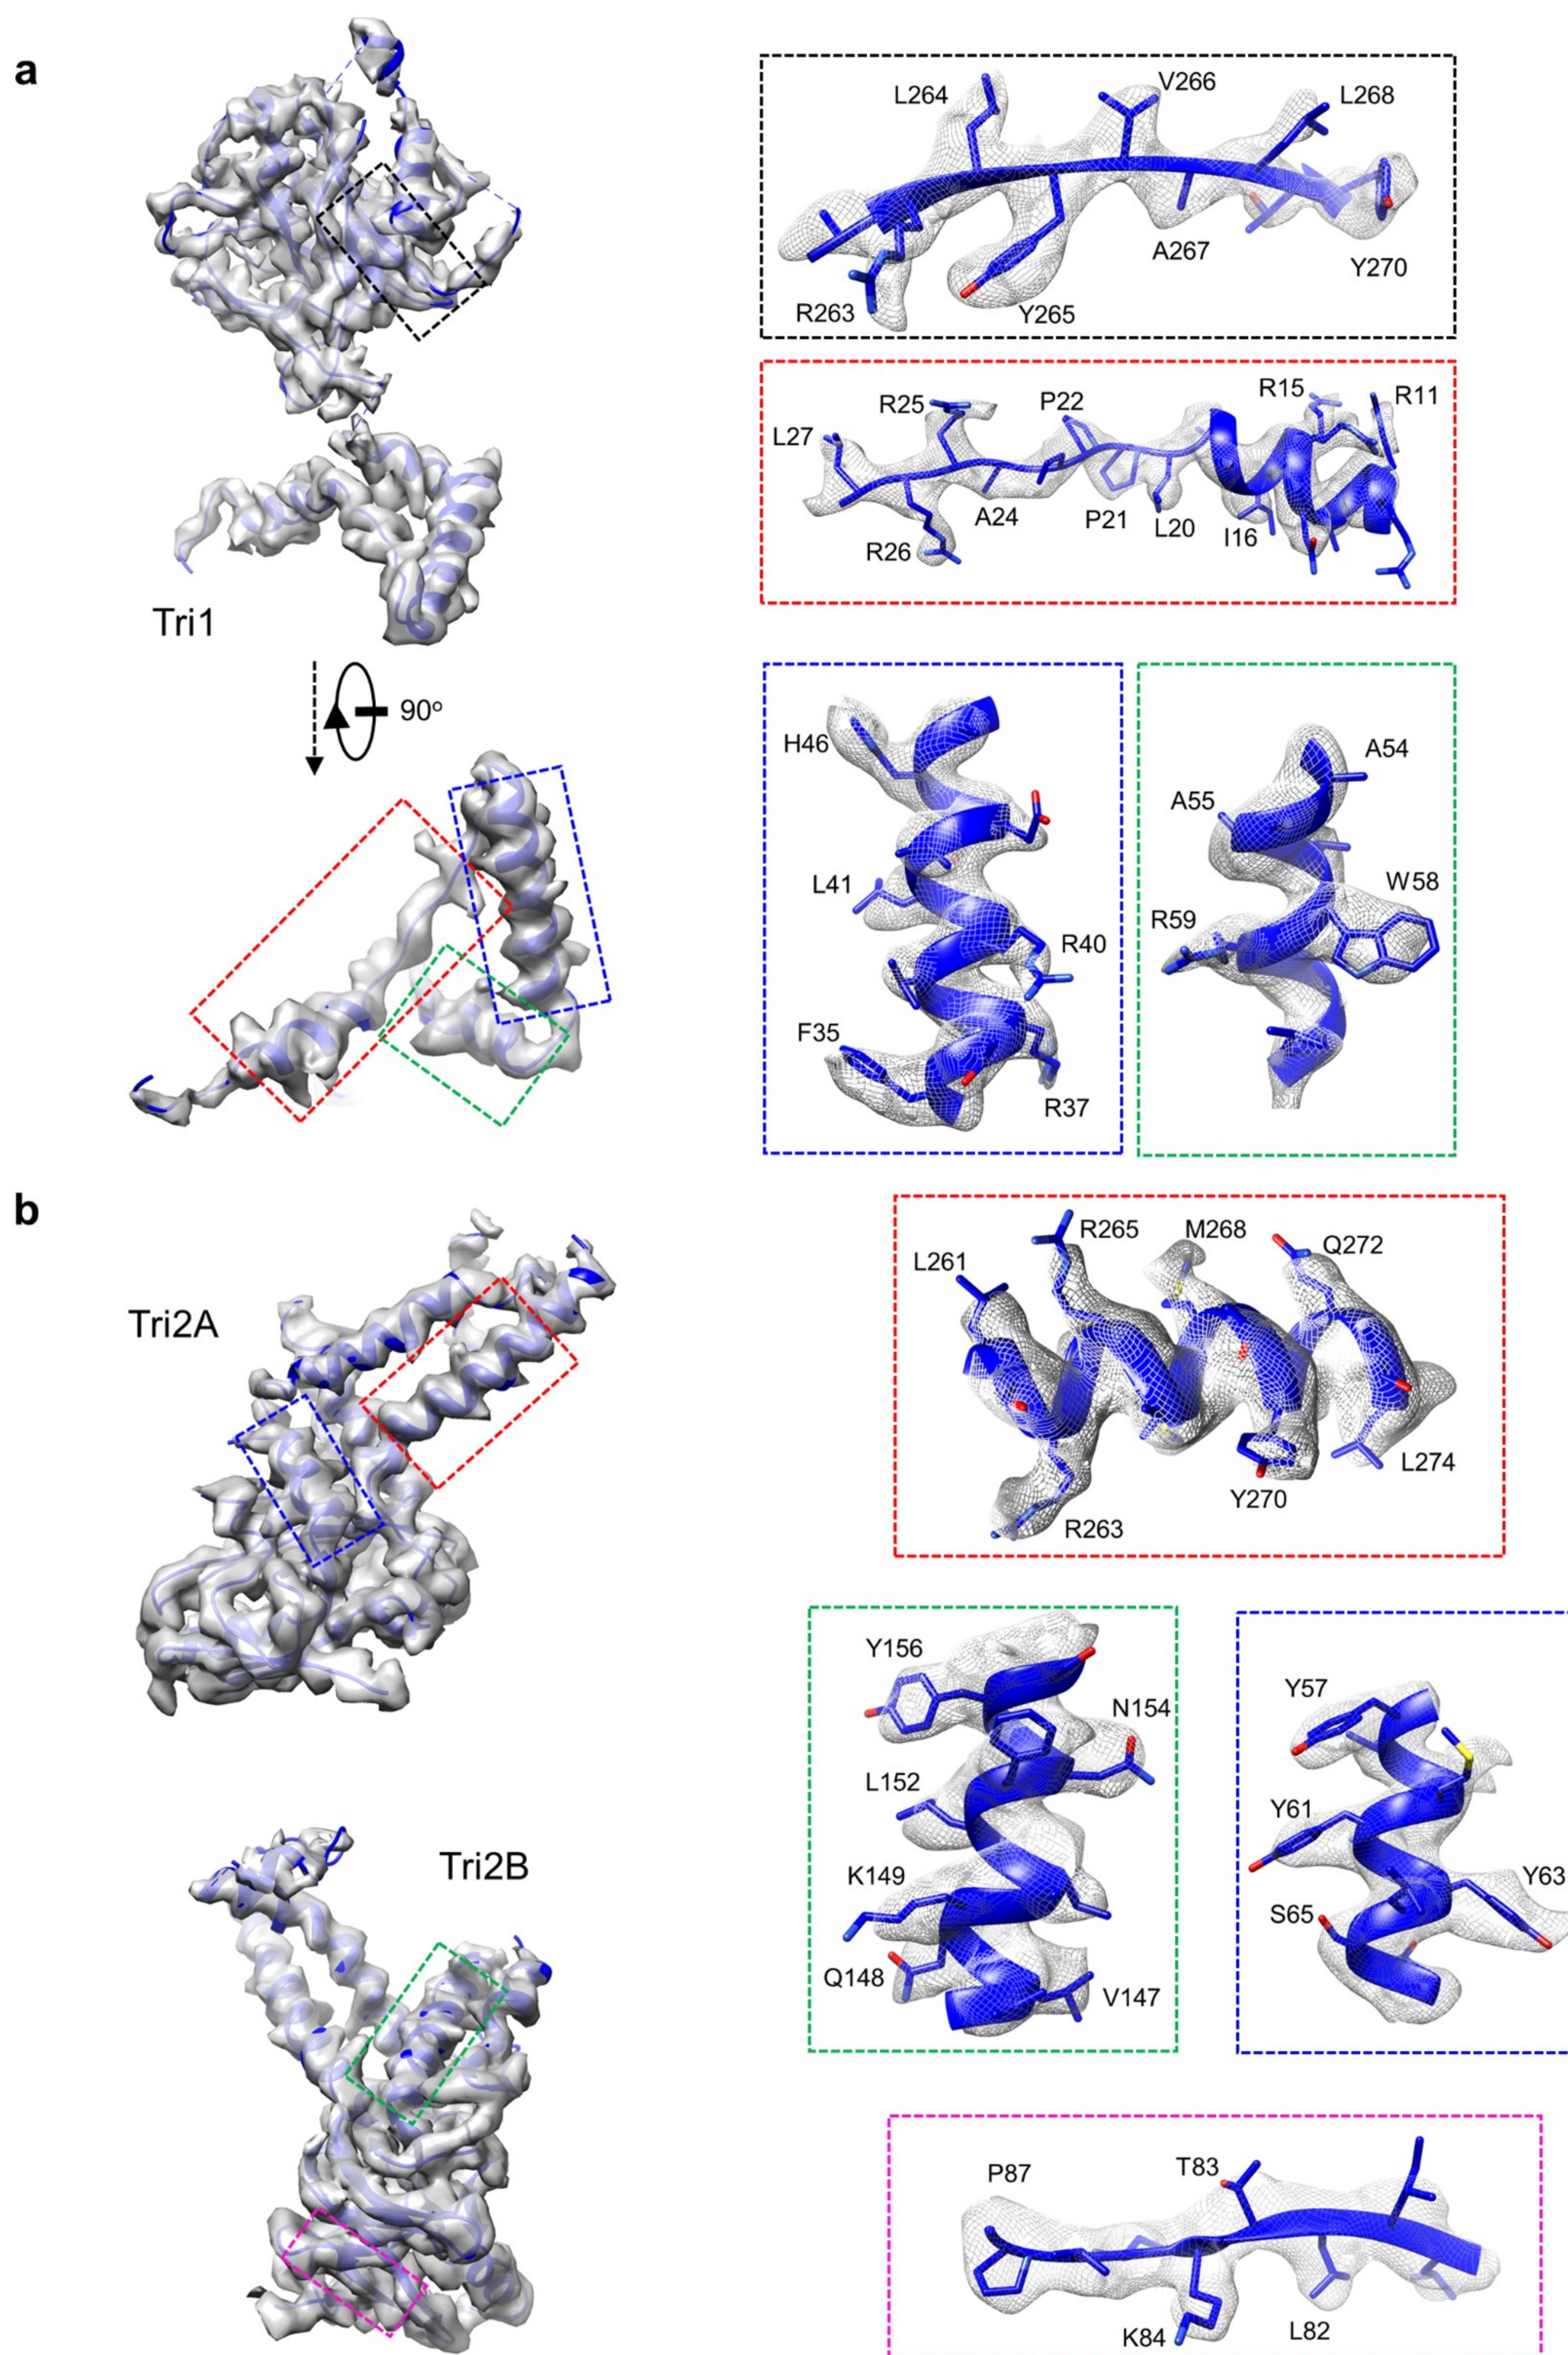

**Supplementary information, Fig. S5| Density maps from the 3.5 Å resolution map of the penton vertex and atomic models of triplex heterotrimer—Tri1 (a), Tri2A and Tri2B (b)**

The densities were derived from the 3.5 Å resolution reconstruction of the penton vertex. The insets are zoomed-in views of the boxed regions to illustrate the side-chain features in the density maps.
