# Supplementary material
Source: PubMed Central journal article supplement (PMC7609766)
Supplement: 41422_2020_363_MOESM9_ESM.pdf [file 41422_2020_363_MOESM9_ESM.pdf]

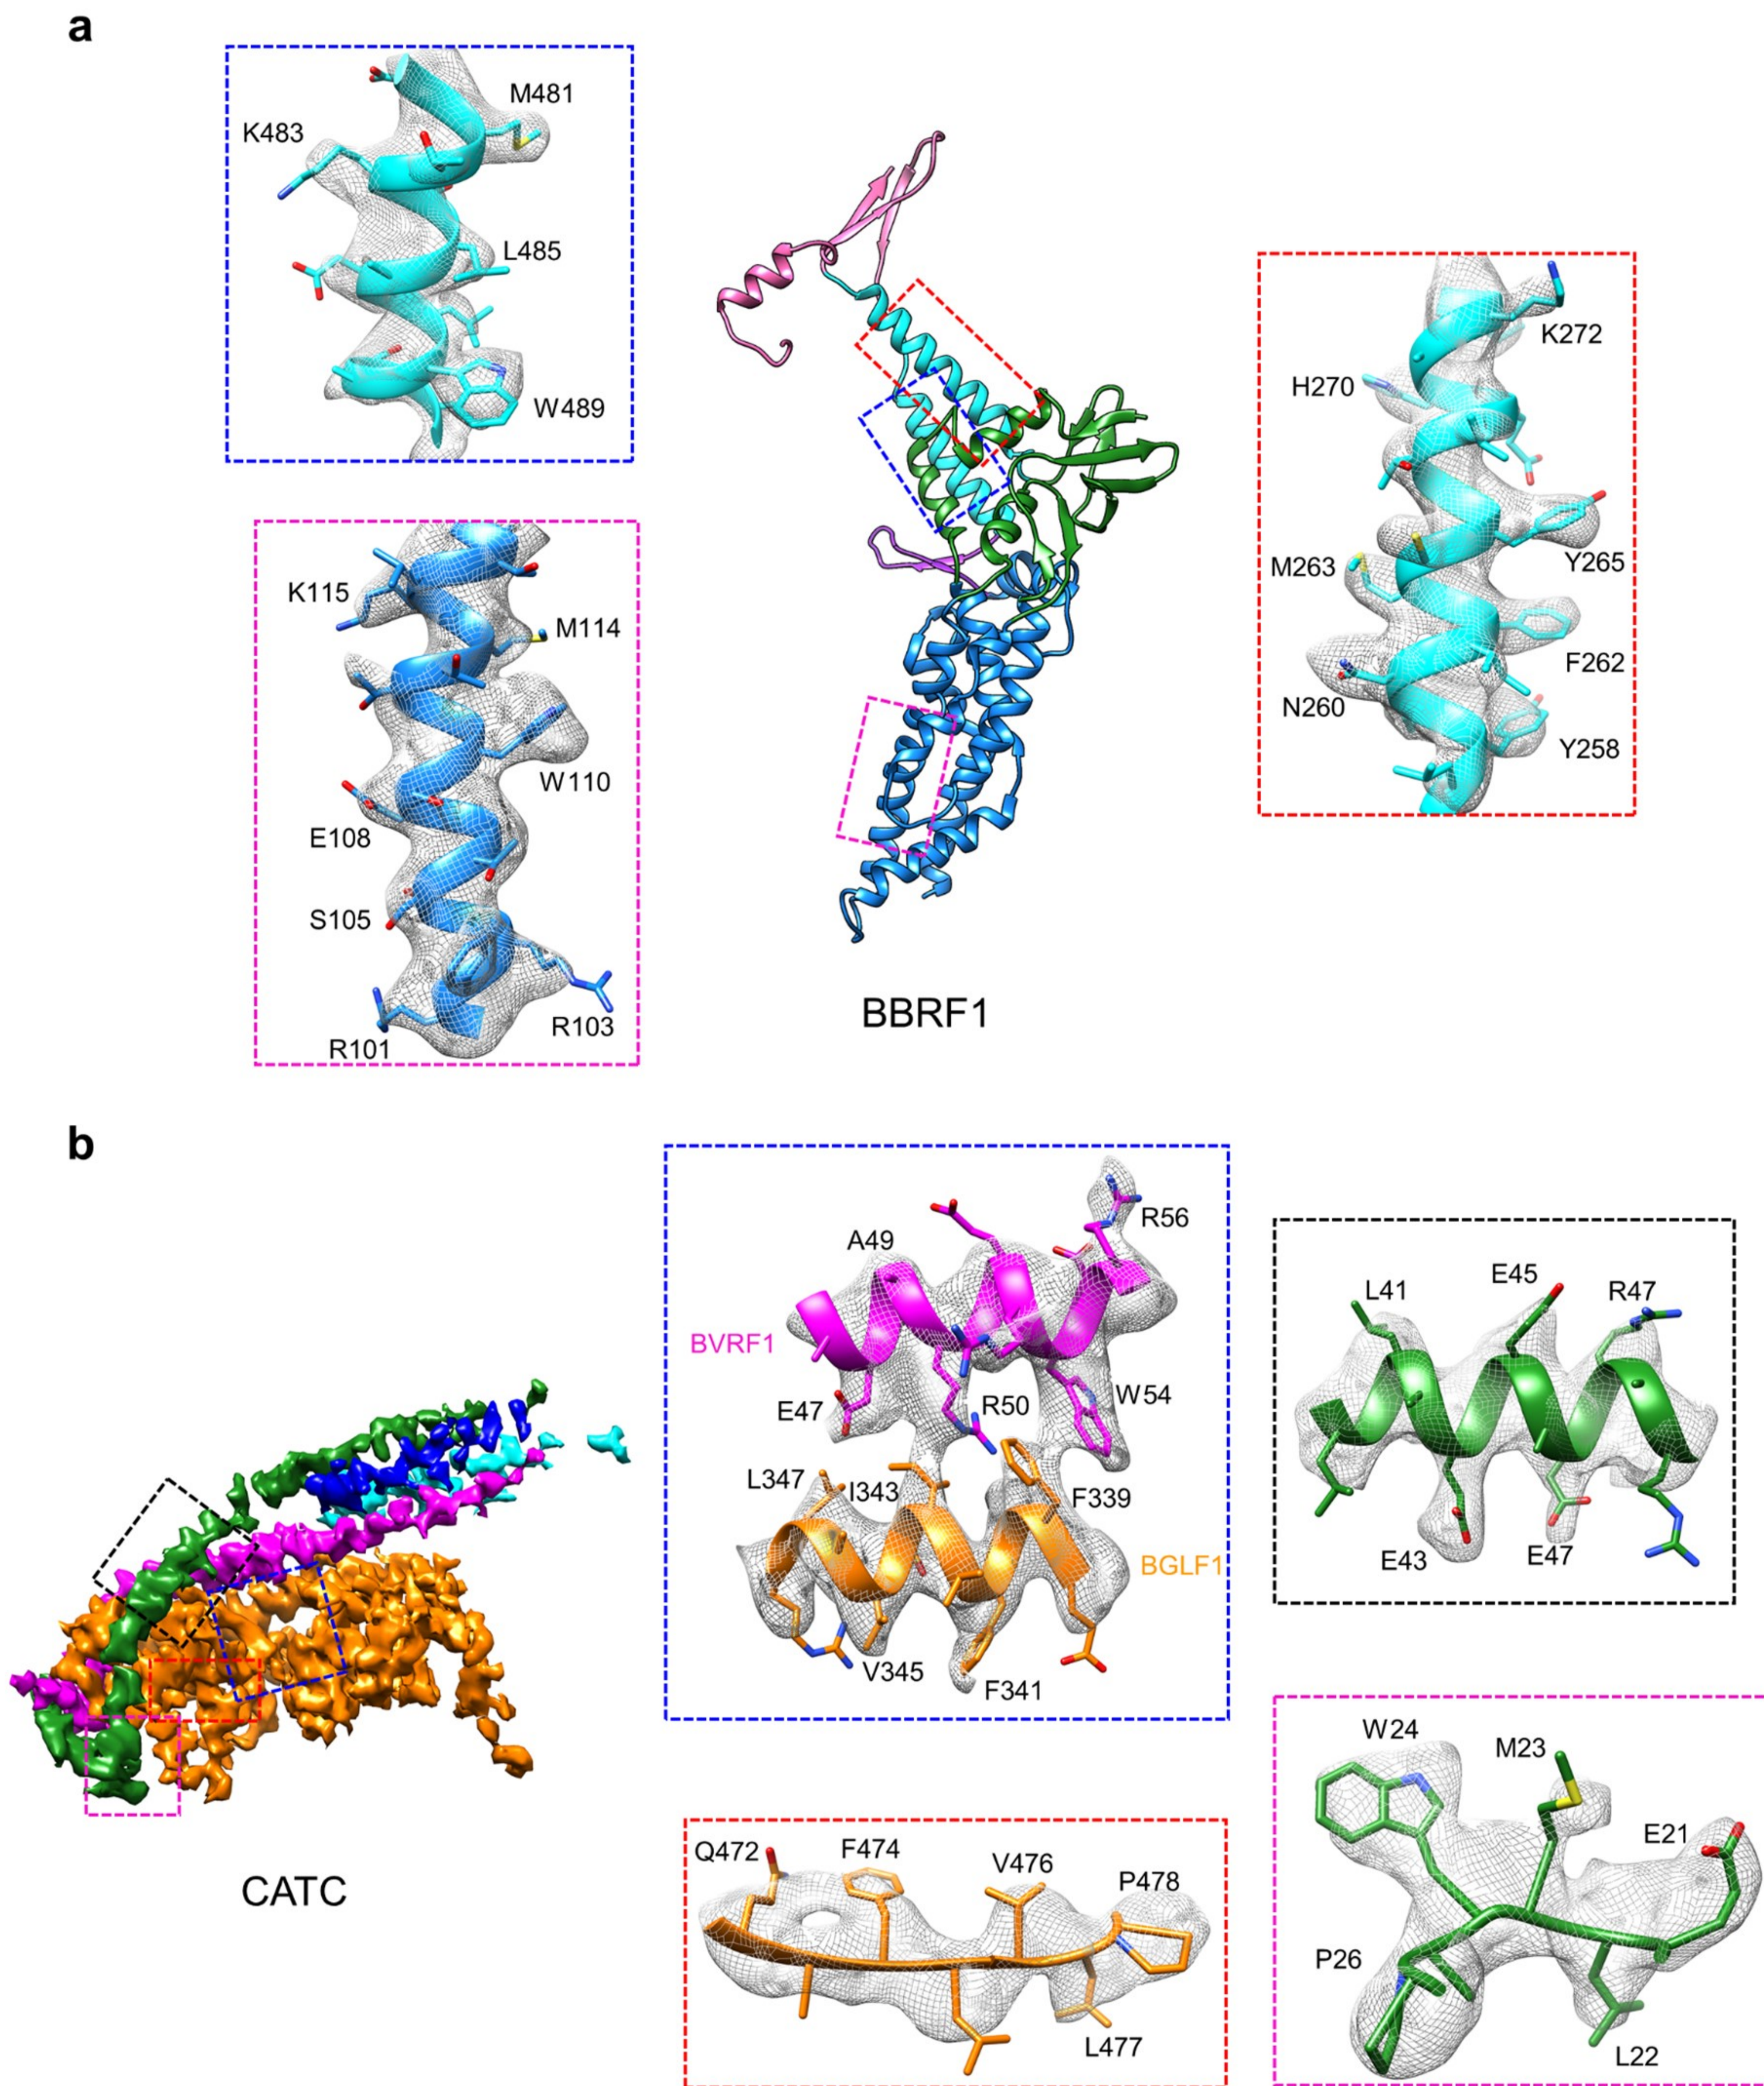

**Supplementary information, Fig. S6| Density maps and atomic models of BBRF1 and CATC.**

**a** BBRF1 density map and atomic model.

**b** Density maps and atomic models of the CATC in the portal-proximal penton vertex. Insets are zoomed-in views of the boxed regions to show the residue features in the density maps.
