# Supplementary material
Source: PubMed Central journal article supplement (PMC7609766)
Supplement: 41422_2020_363_MOESM10_ESM.pdf [file 41422_2020_363_MOESM10_ESM.pdf]

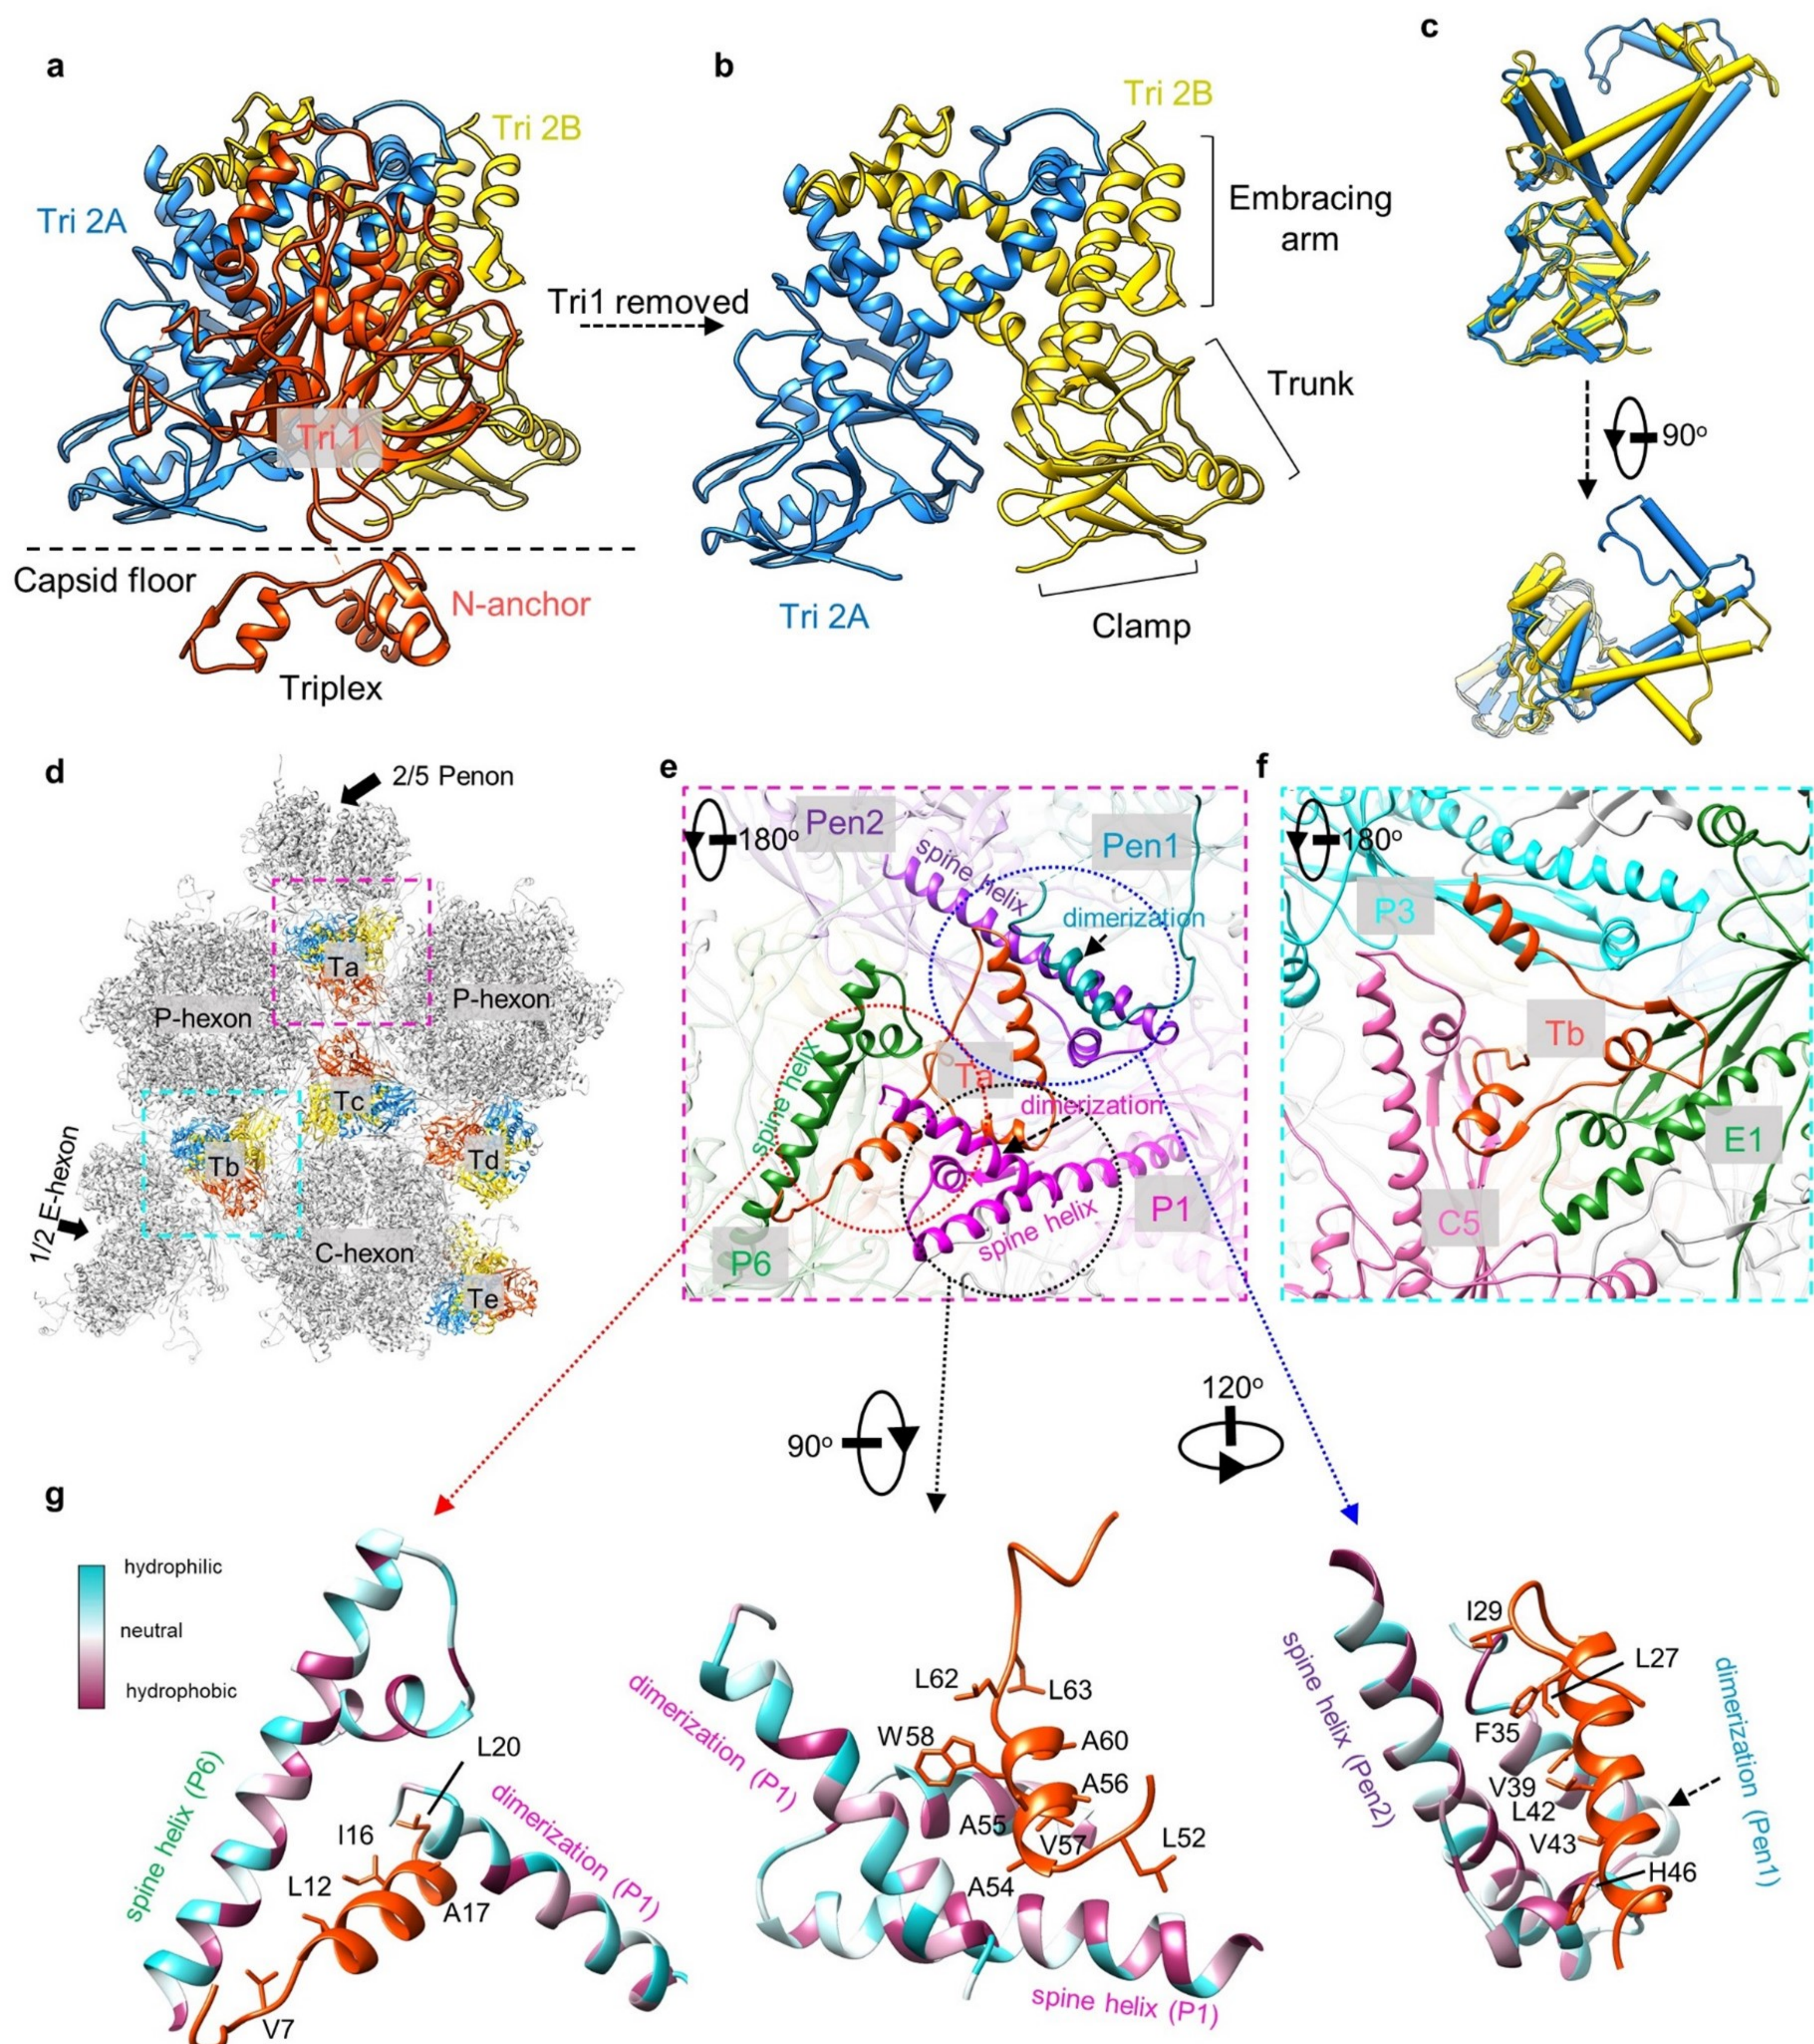

## Supplementary information, Fig. S7| Triplex structure and interactions with MCP.

**a** Triplex structure.

**b** Models of Tri2A (blue) and Tri2B (yellow), showing that the two conformers embrace each other.

**c** Superposition between Tri2A and Tri2B, showing that the two conformers have nearly identical clamp and trunk domains but significantly different embracing arms.

**d** Overview of triplexes and MCPs.

**e-f** Zoomed-in views in (b) from capsid interior, showing the N-anchoring of triplex Ta (e) and Tb (f), respectively, to the capsid floor.

**g** Hydrophobic interactions between N-anchor of Ta Tri1 and capsid proteins. The hydrophobic residues of helices in N-anchor are highlighted by showing side chains. The helices in capsid proteins are colored according to the hydrophobicity of their residues.
