# Supplementary material
Source: PubMed Central journal article supplement (PMC7609766)
Supplement: 41422_2020_363_MOESM11_ESM.pdf [file 41422_2020_363_MOESM11_ESM.pdf]

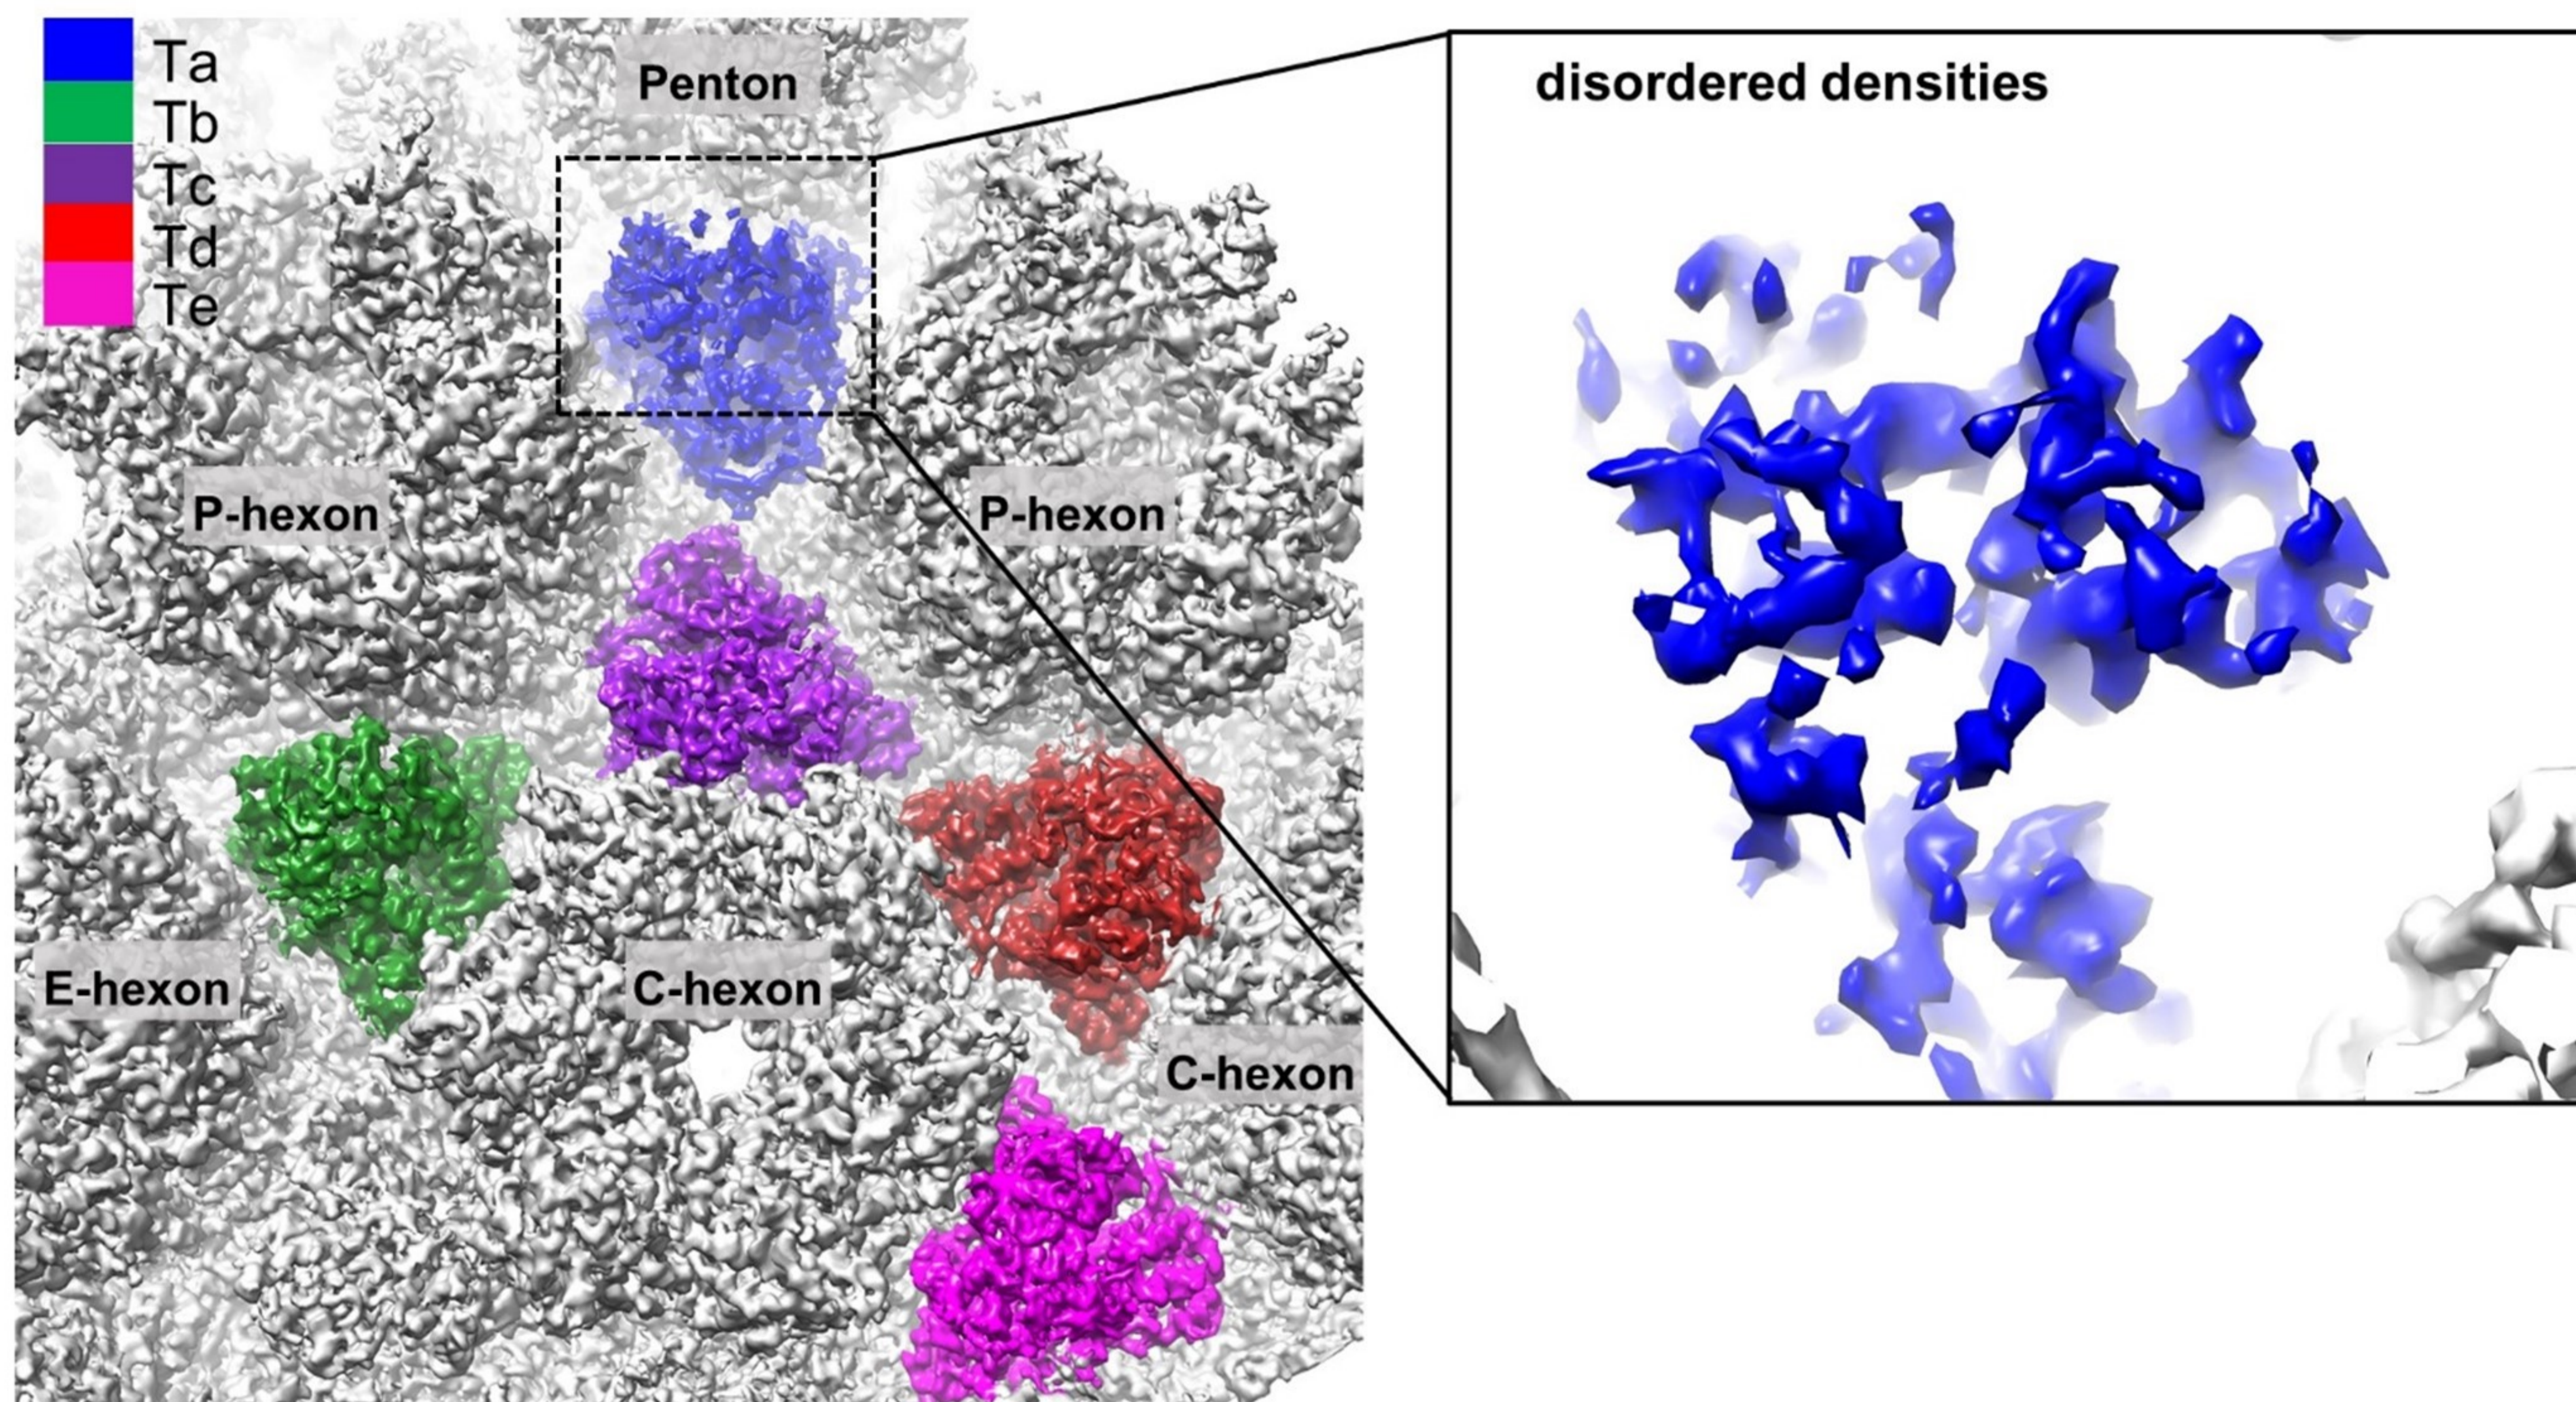

**Supplementary information, Fig. S8| Density map of a selected region from the icosahedral capsid reconstruction.** The MCPs and SCPs are in gray. The triplexes are colored according to the key. The inset is the zoomed-in view of the boxed regions to indicate the disordered densities of Ta.
