# Supplementary material
Source: PubMed Central journal article supplement (PMC7609766)
Supplement: 41422_2020_363_MOESM12_ESM.pdf [file 41422_2020_363_MOESM12_ESM.pdf]

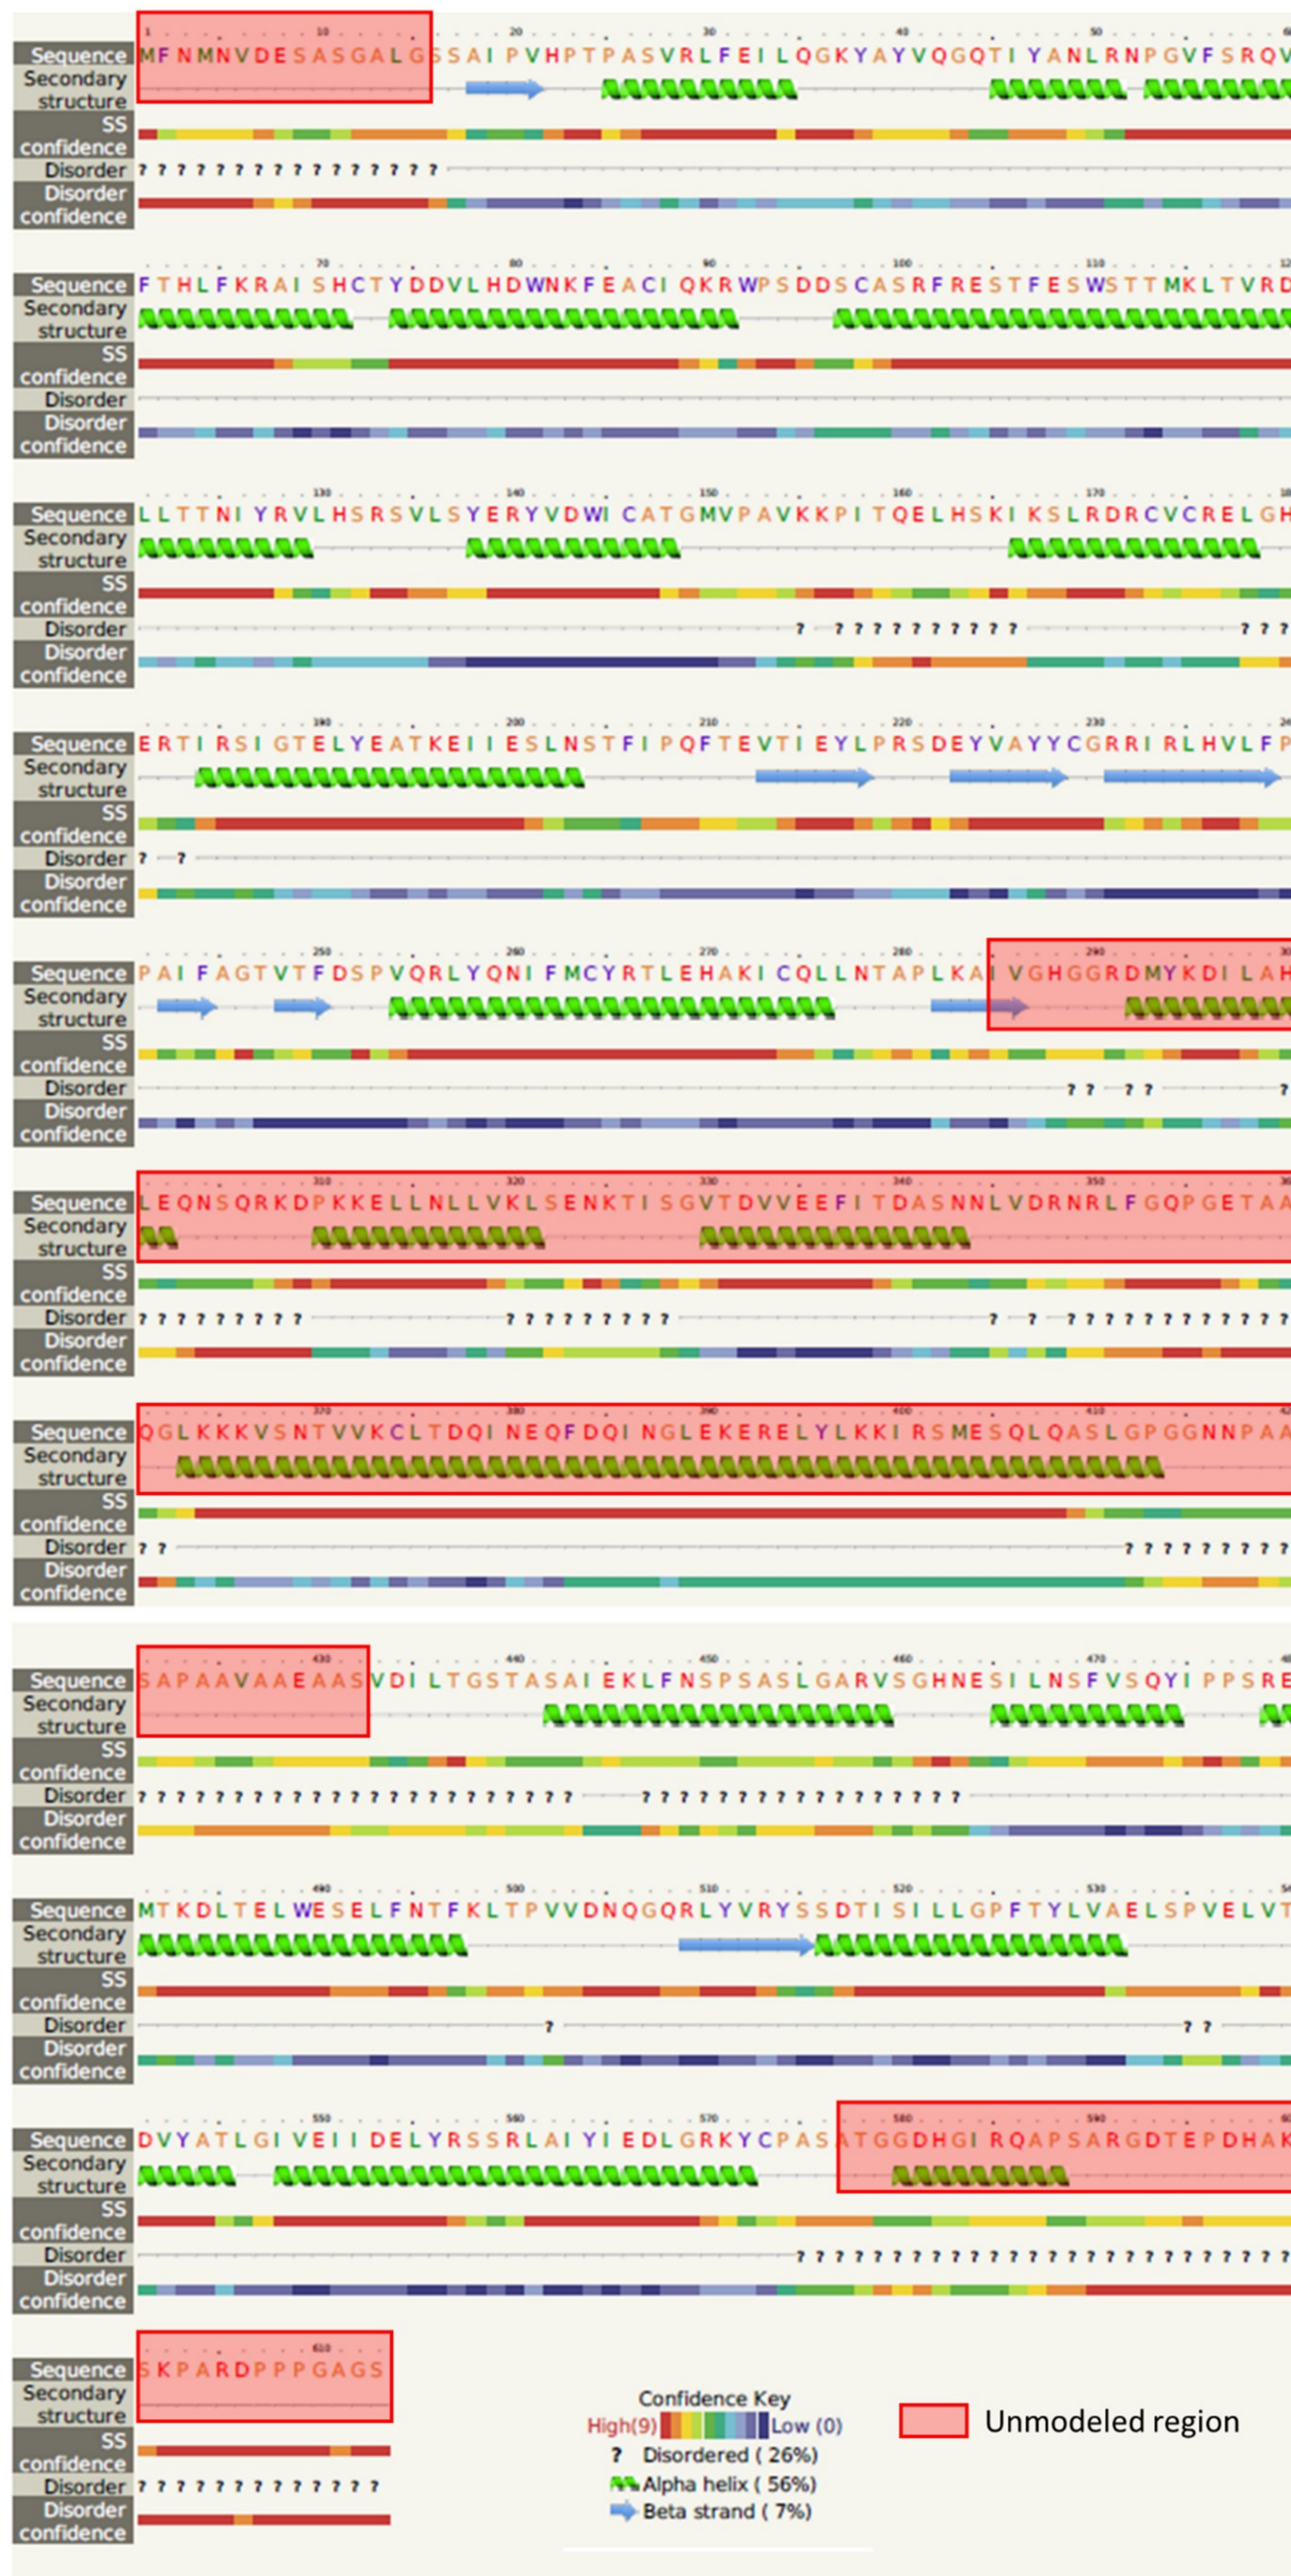

Supplementary information, Fig. S9| Secondary structure and disorder prediction of BBRF1 protein.

The prediction was performed using the *Phyre2*. The red boxes indicated the regions that were not modeled in our BBRF1 structure.
