# Supplementary material
Source: PubMed Central journal article supplement (PMC7609766)
Supplement: 41422_2020_363_MOESM14_ESM.pdf [file 41422_2020_363_MOESM14_ESM.pdf]

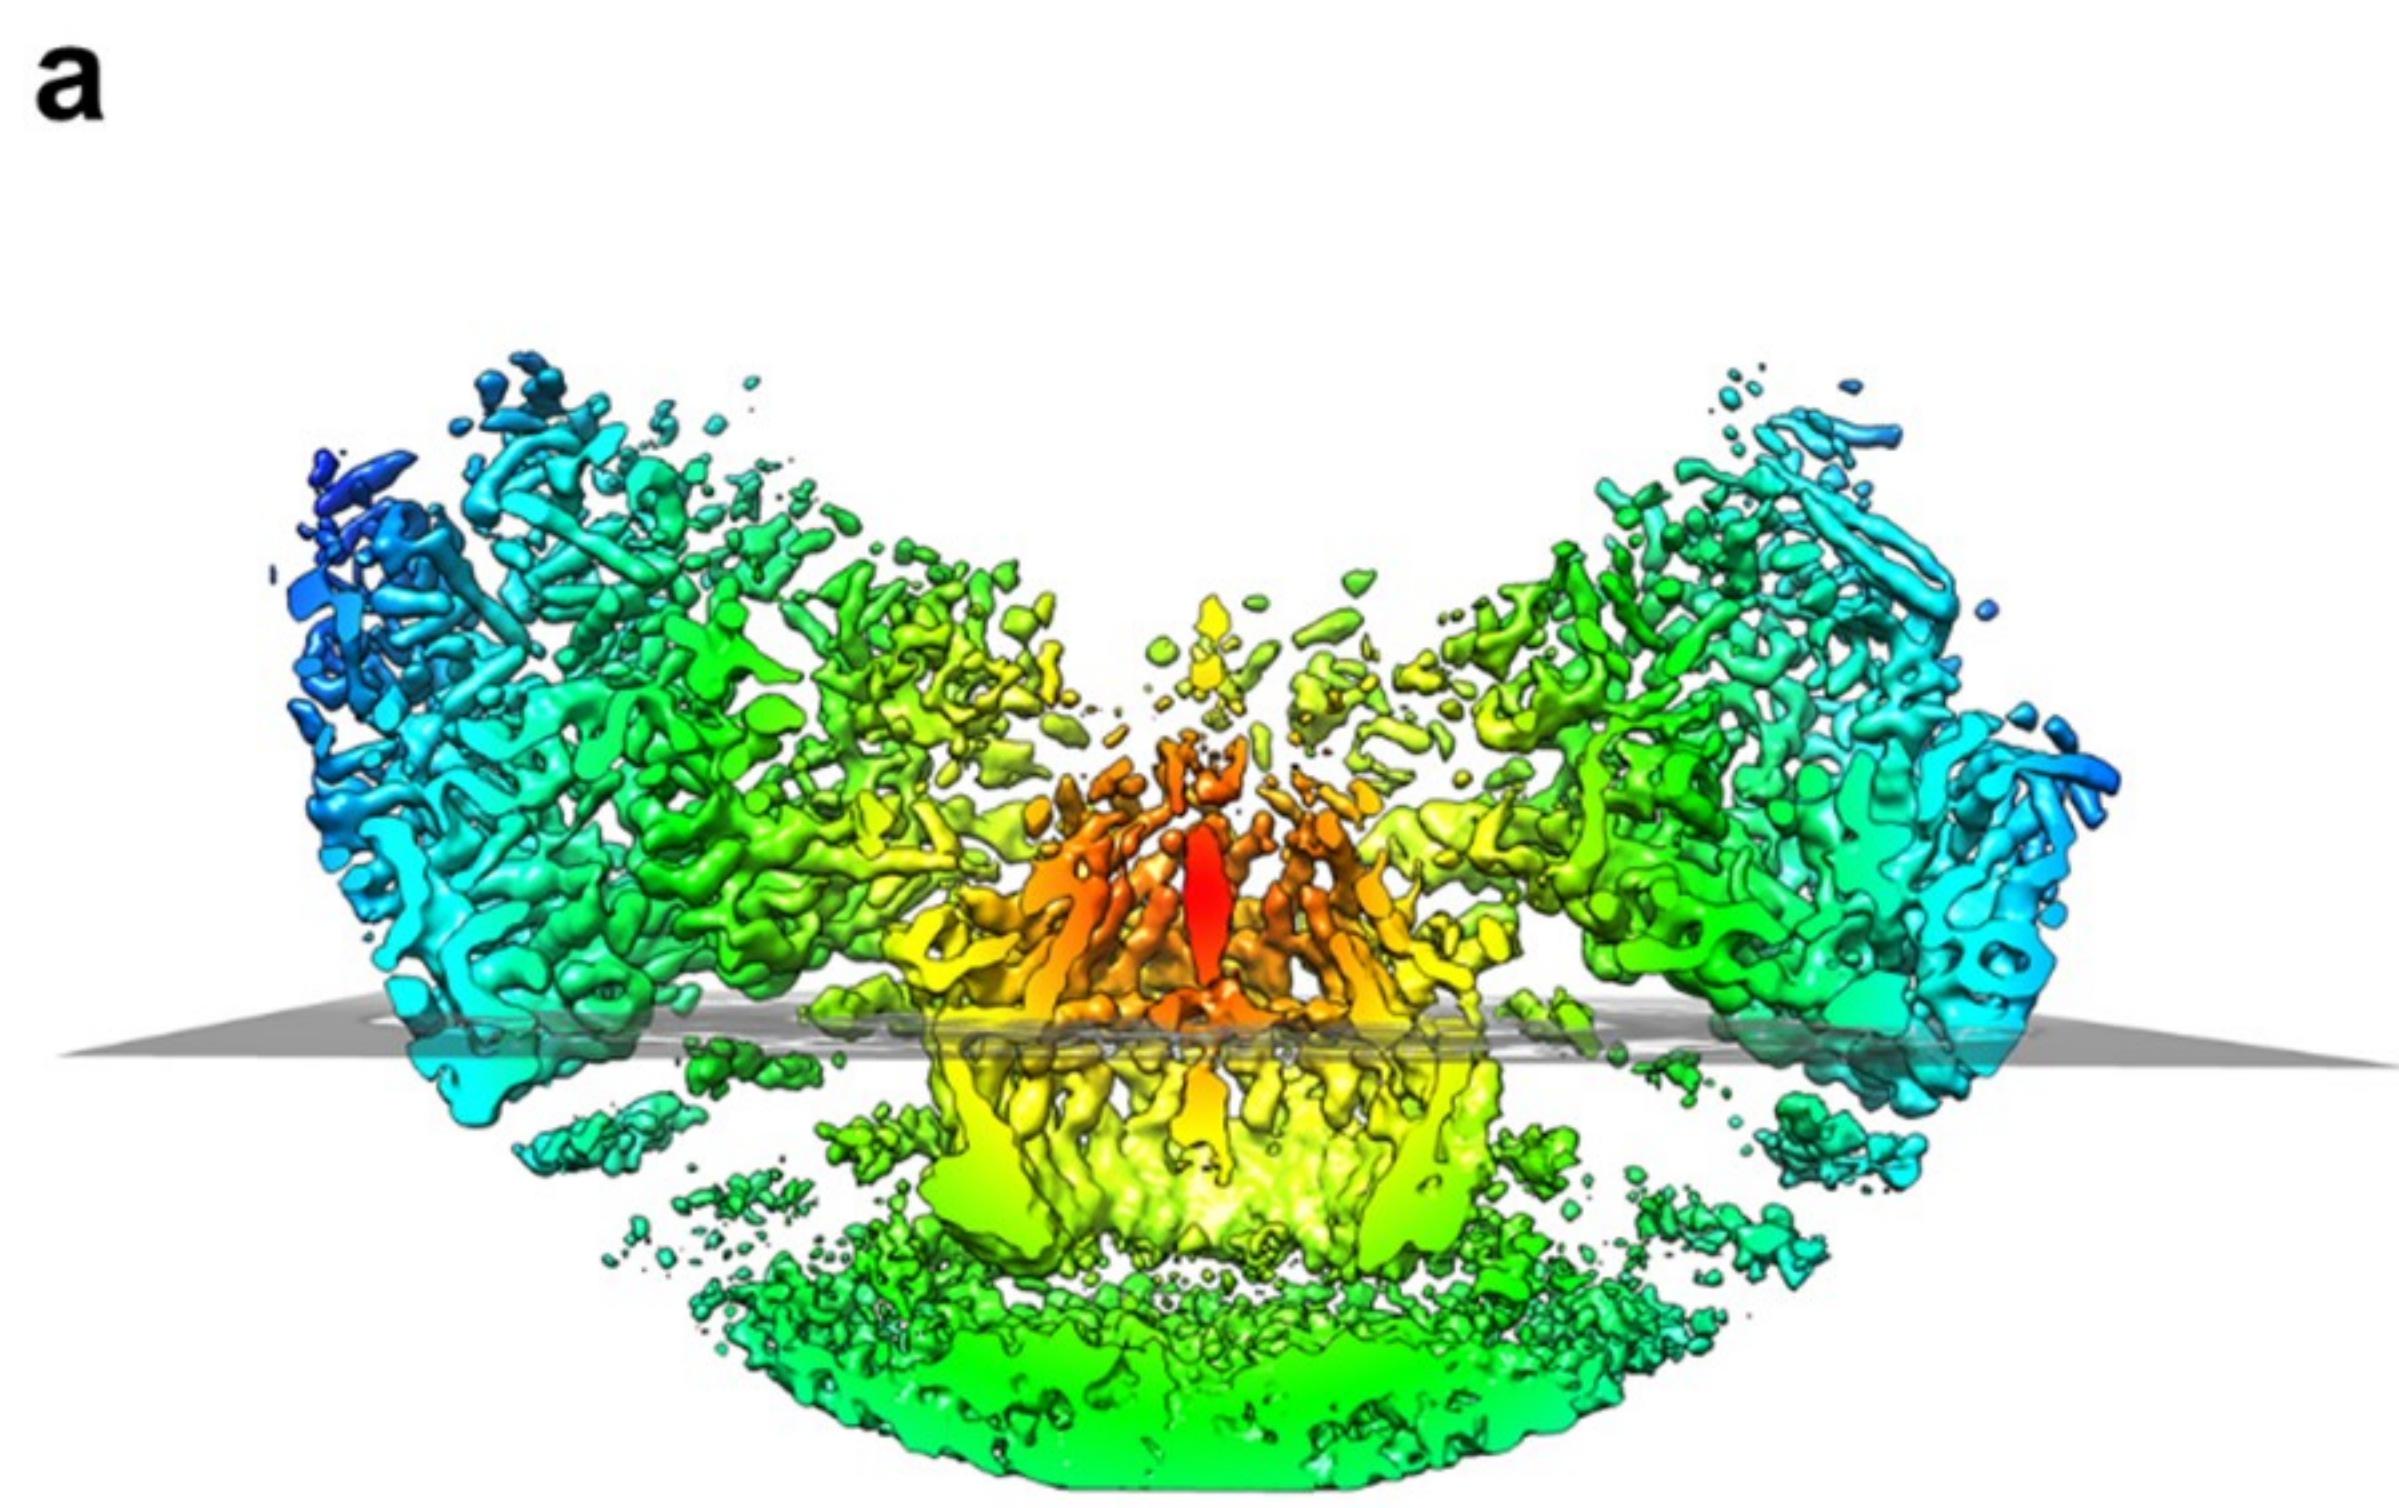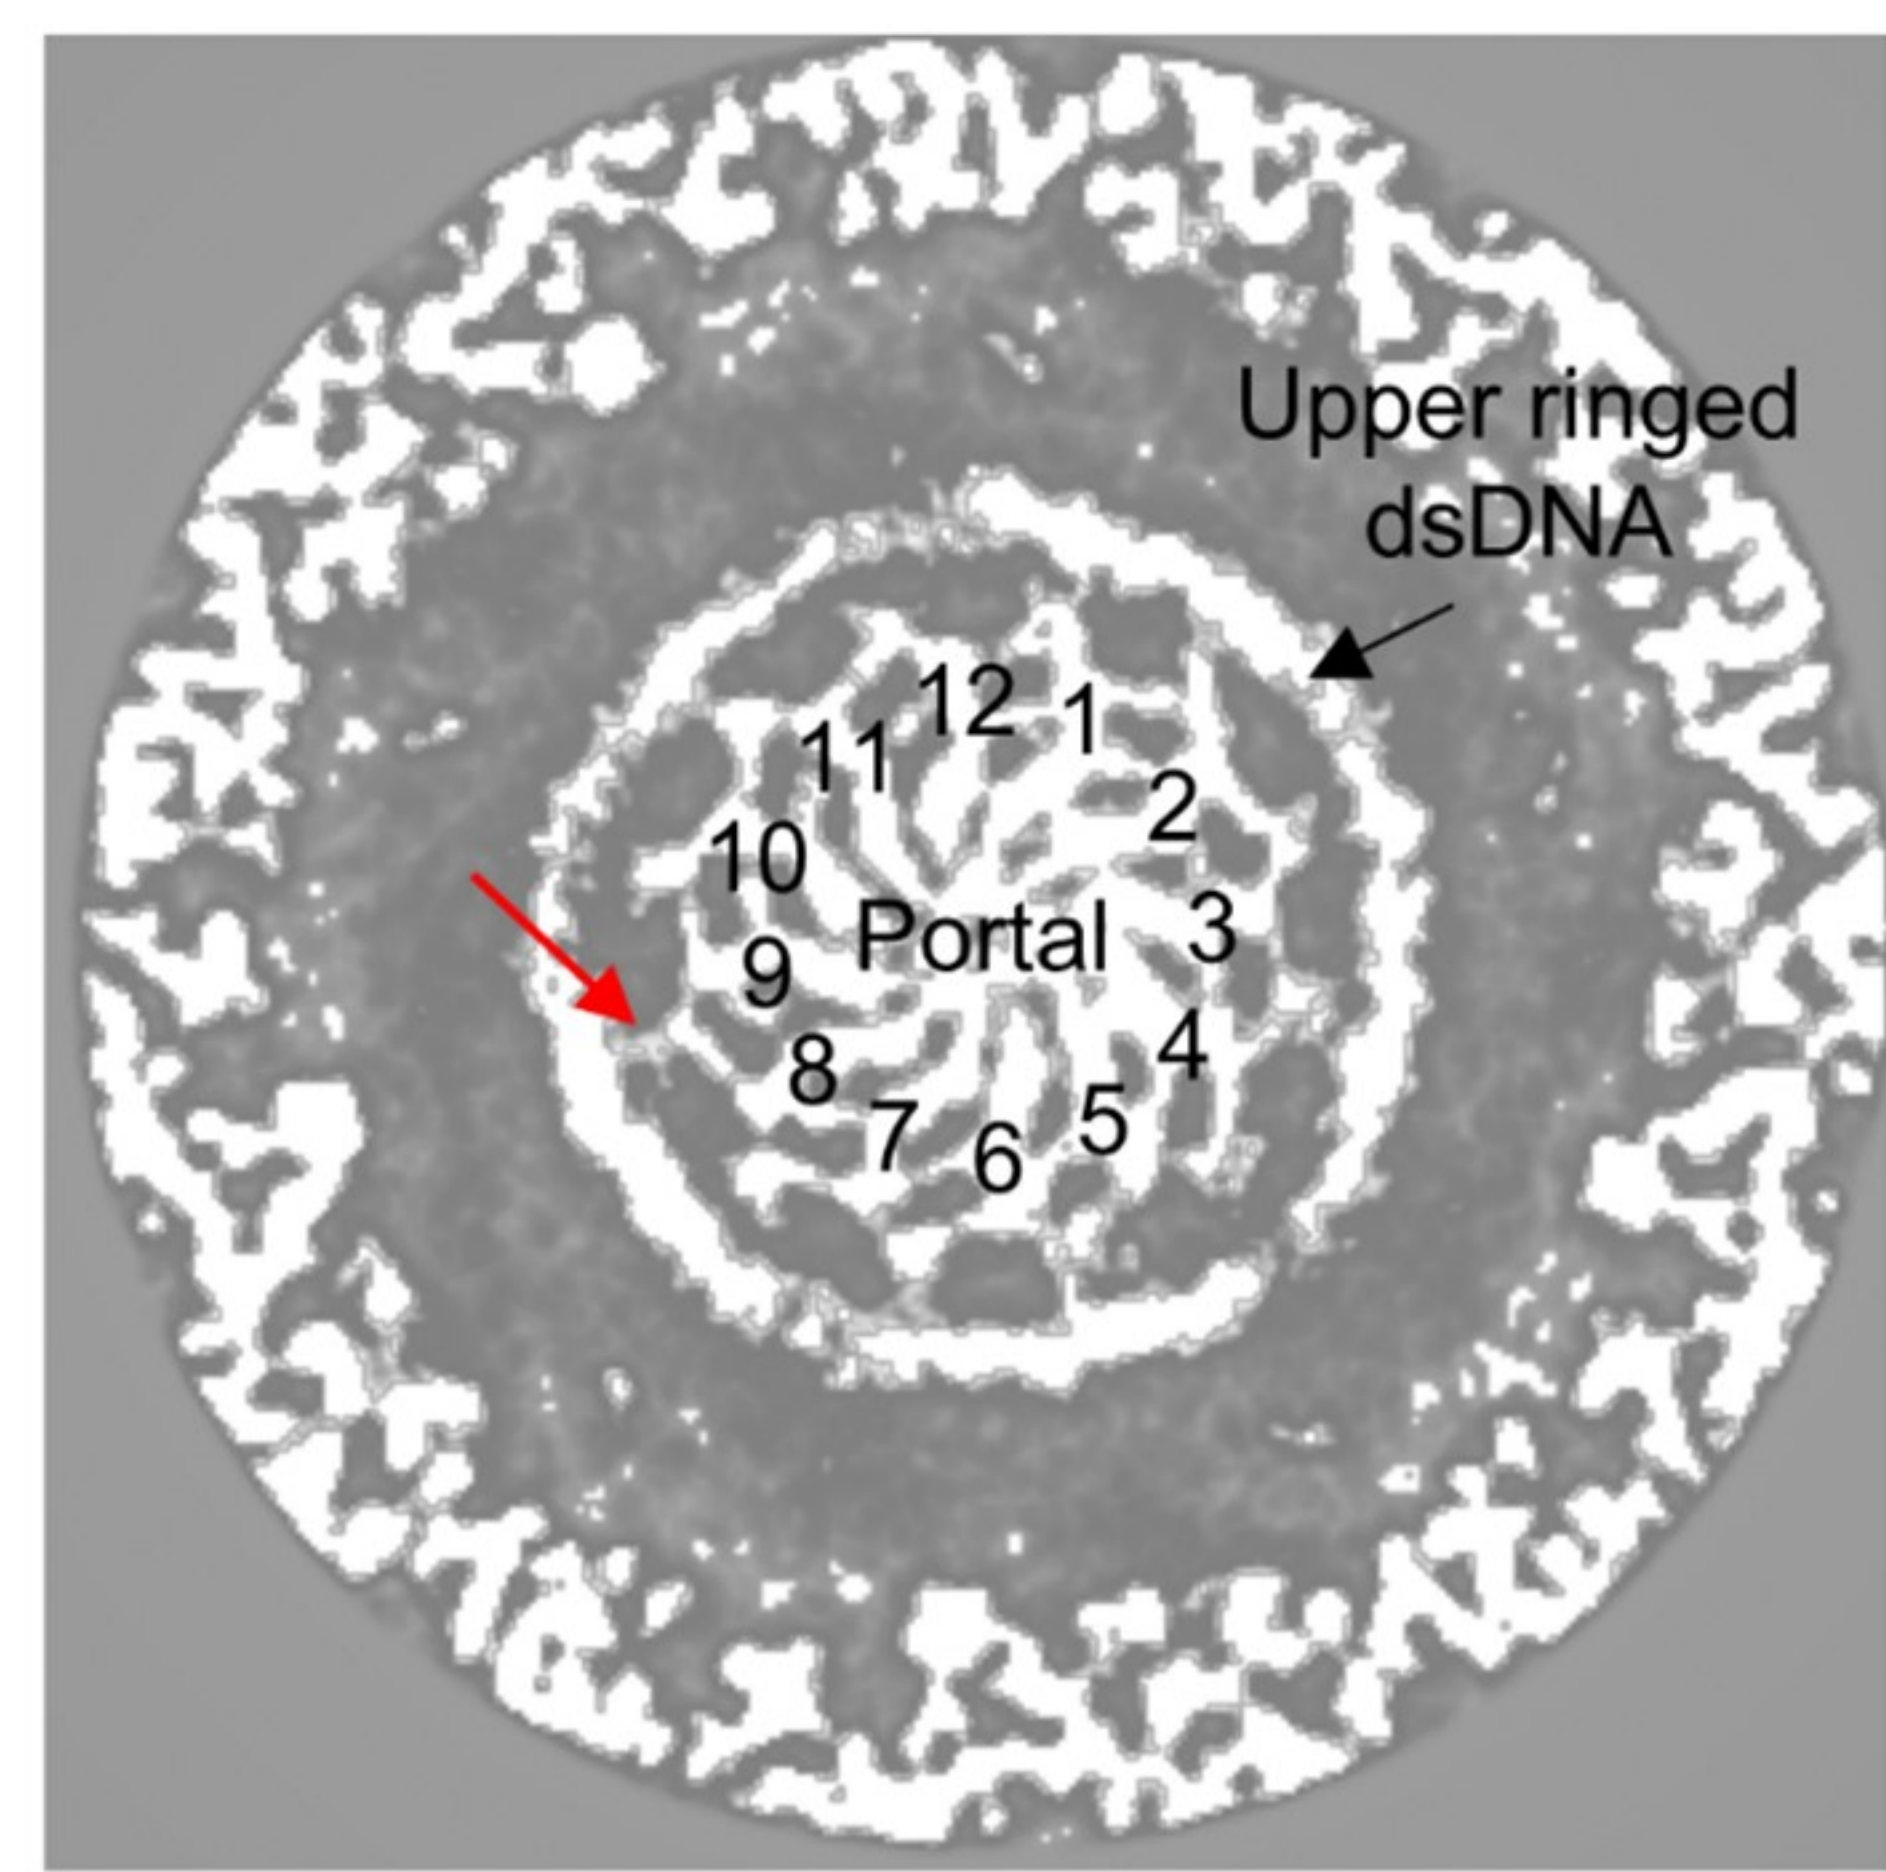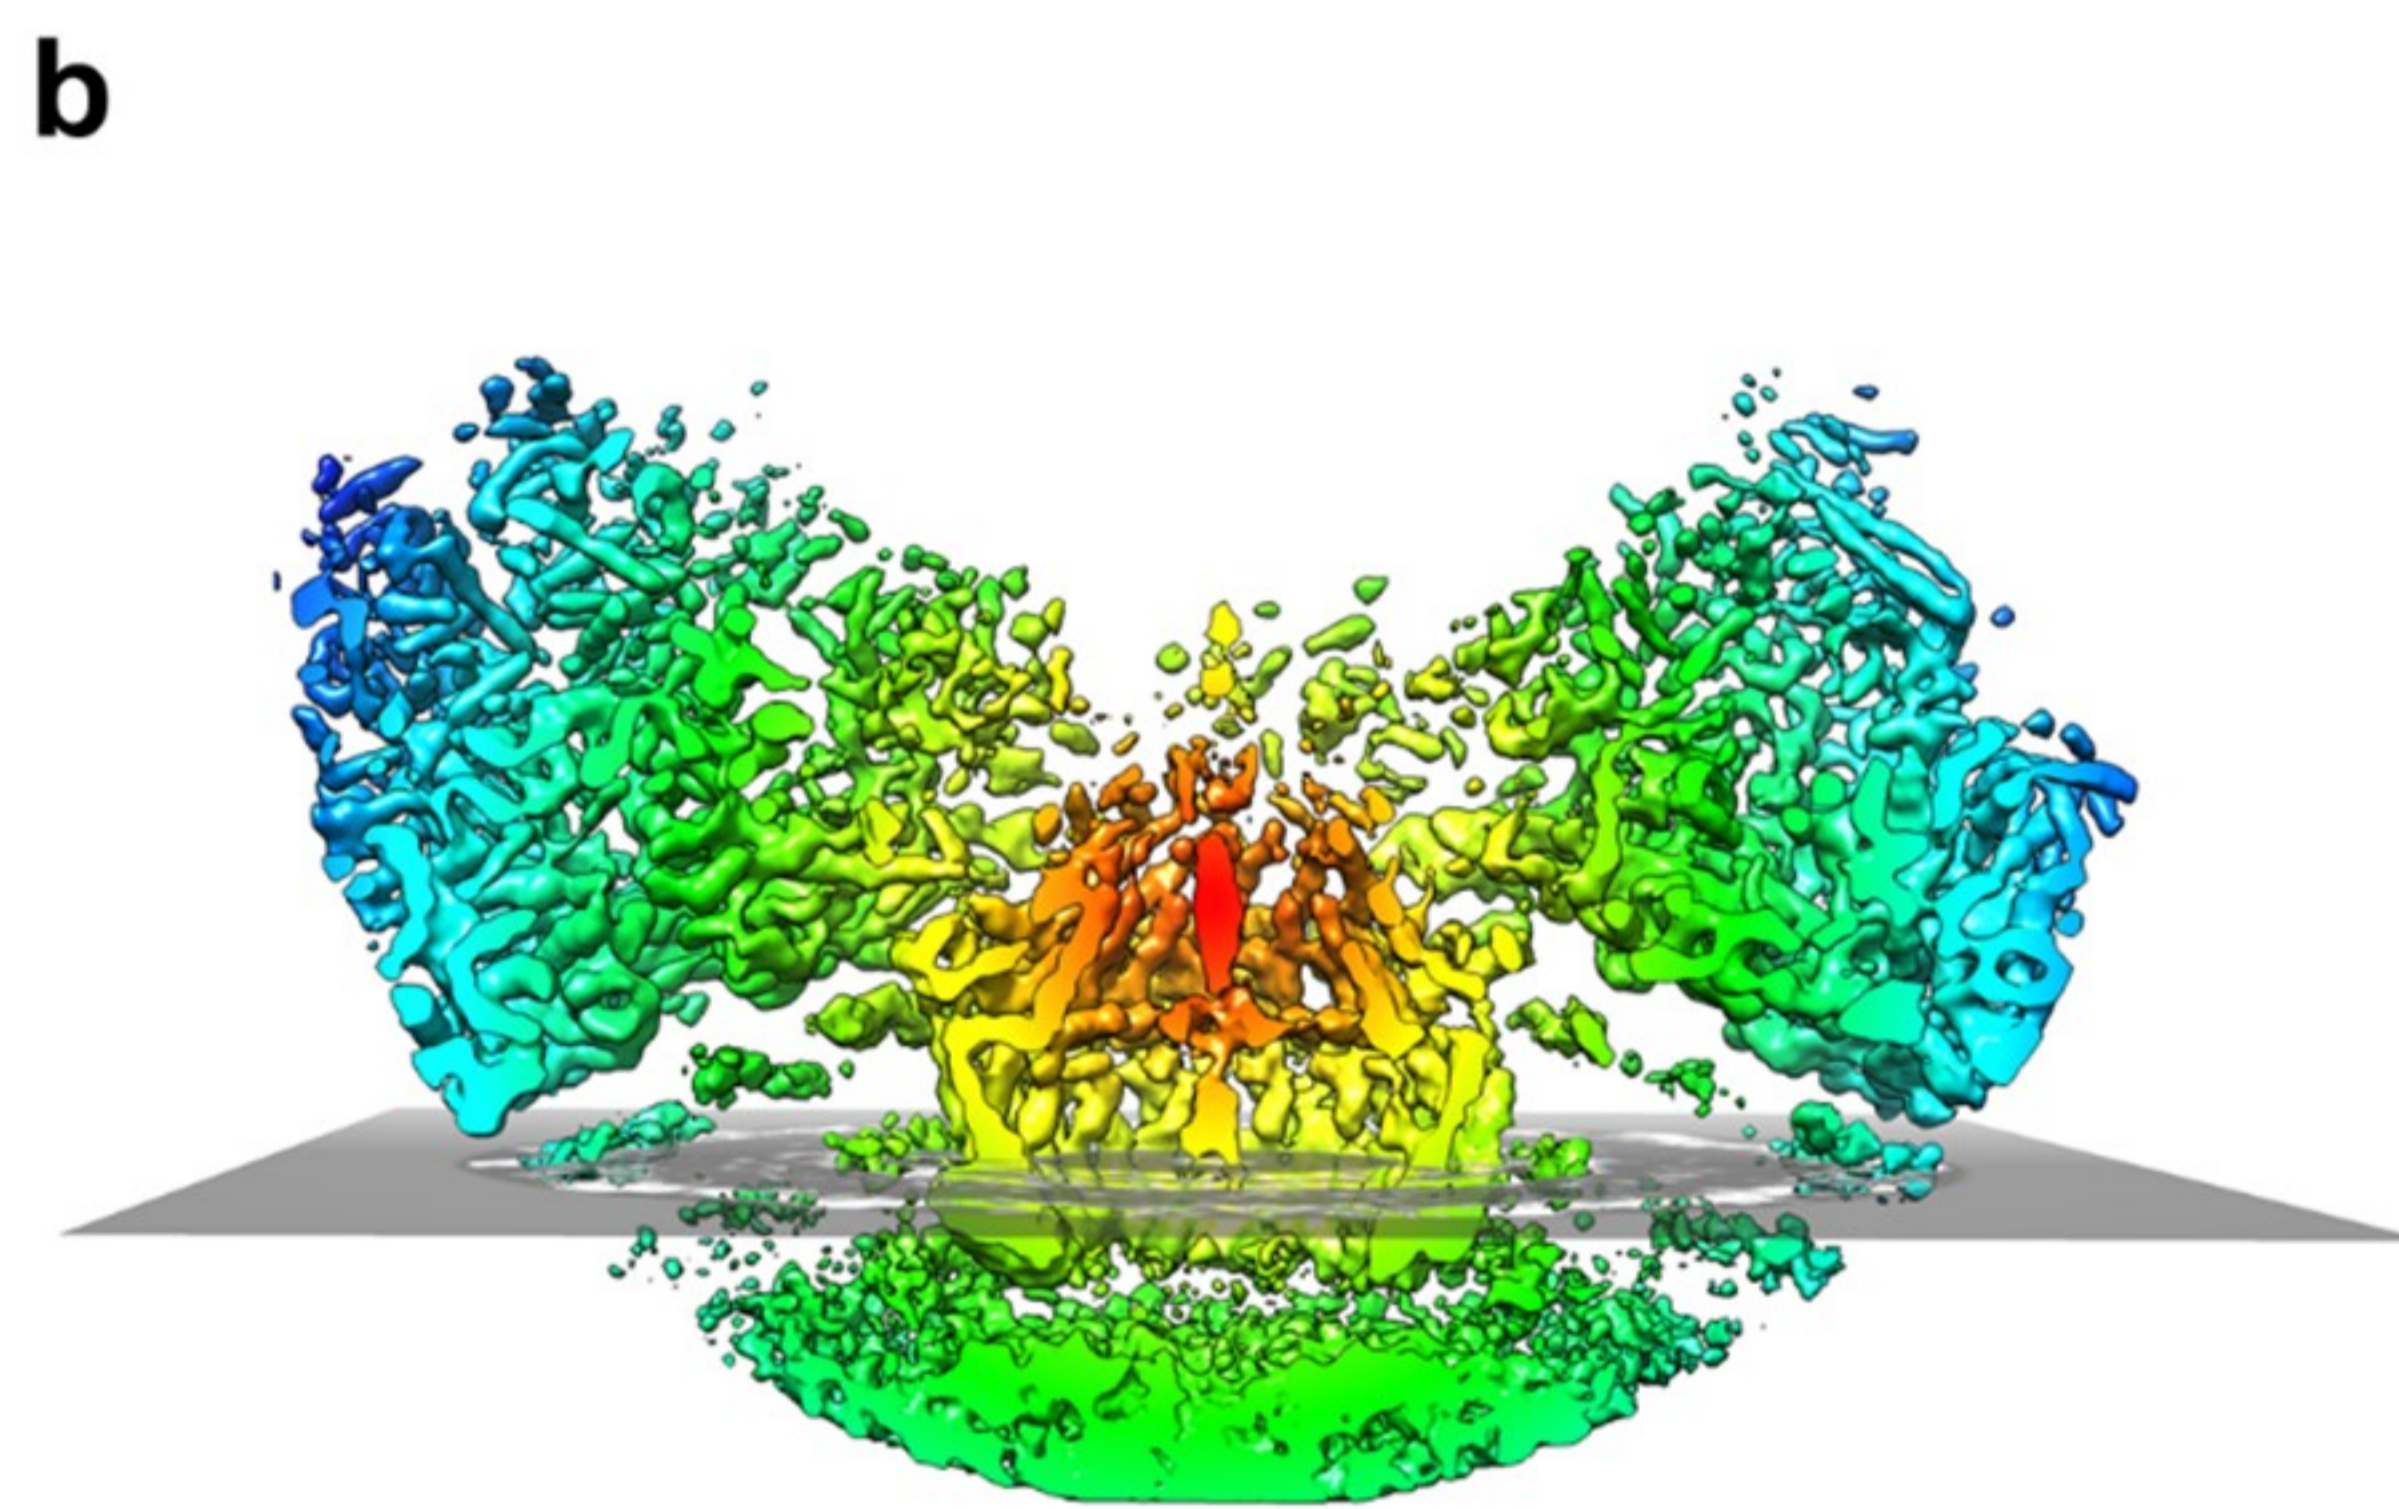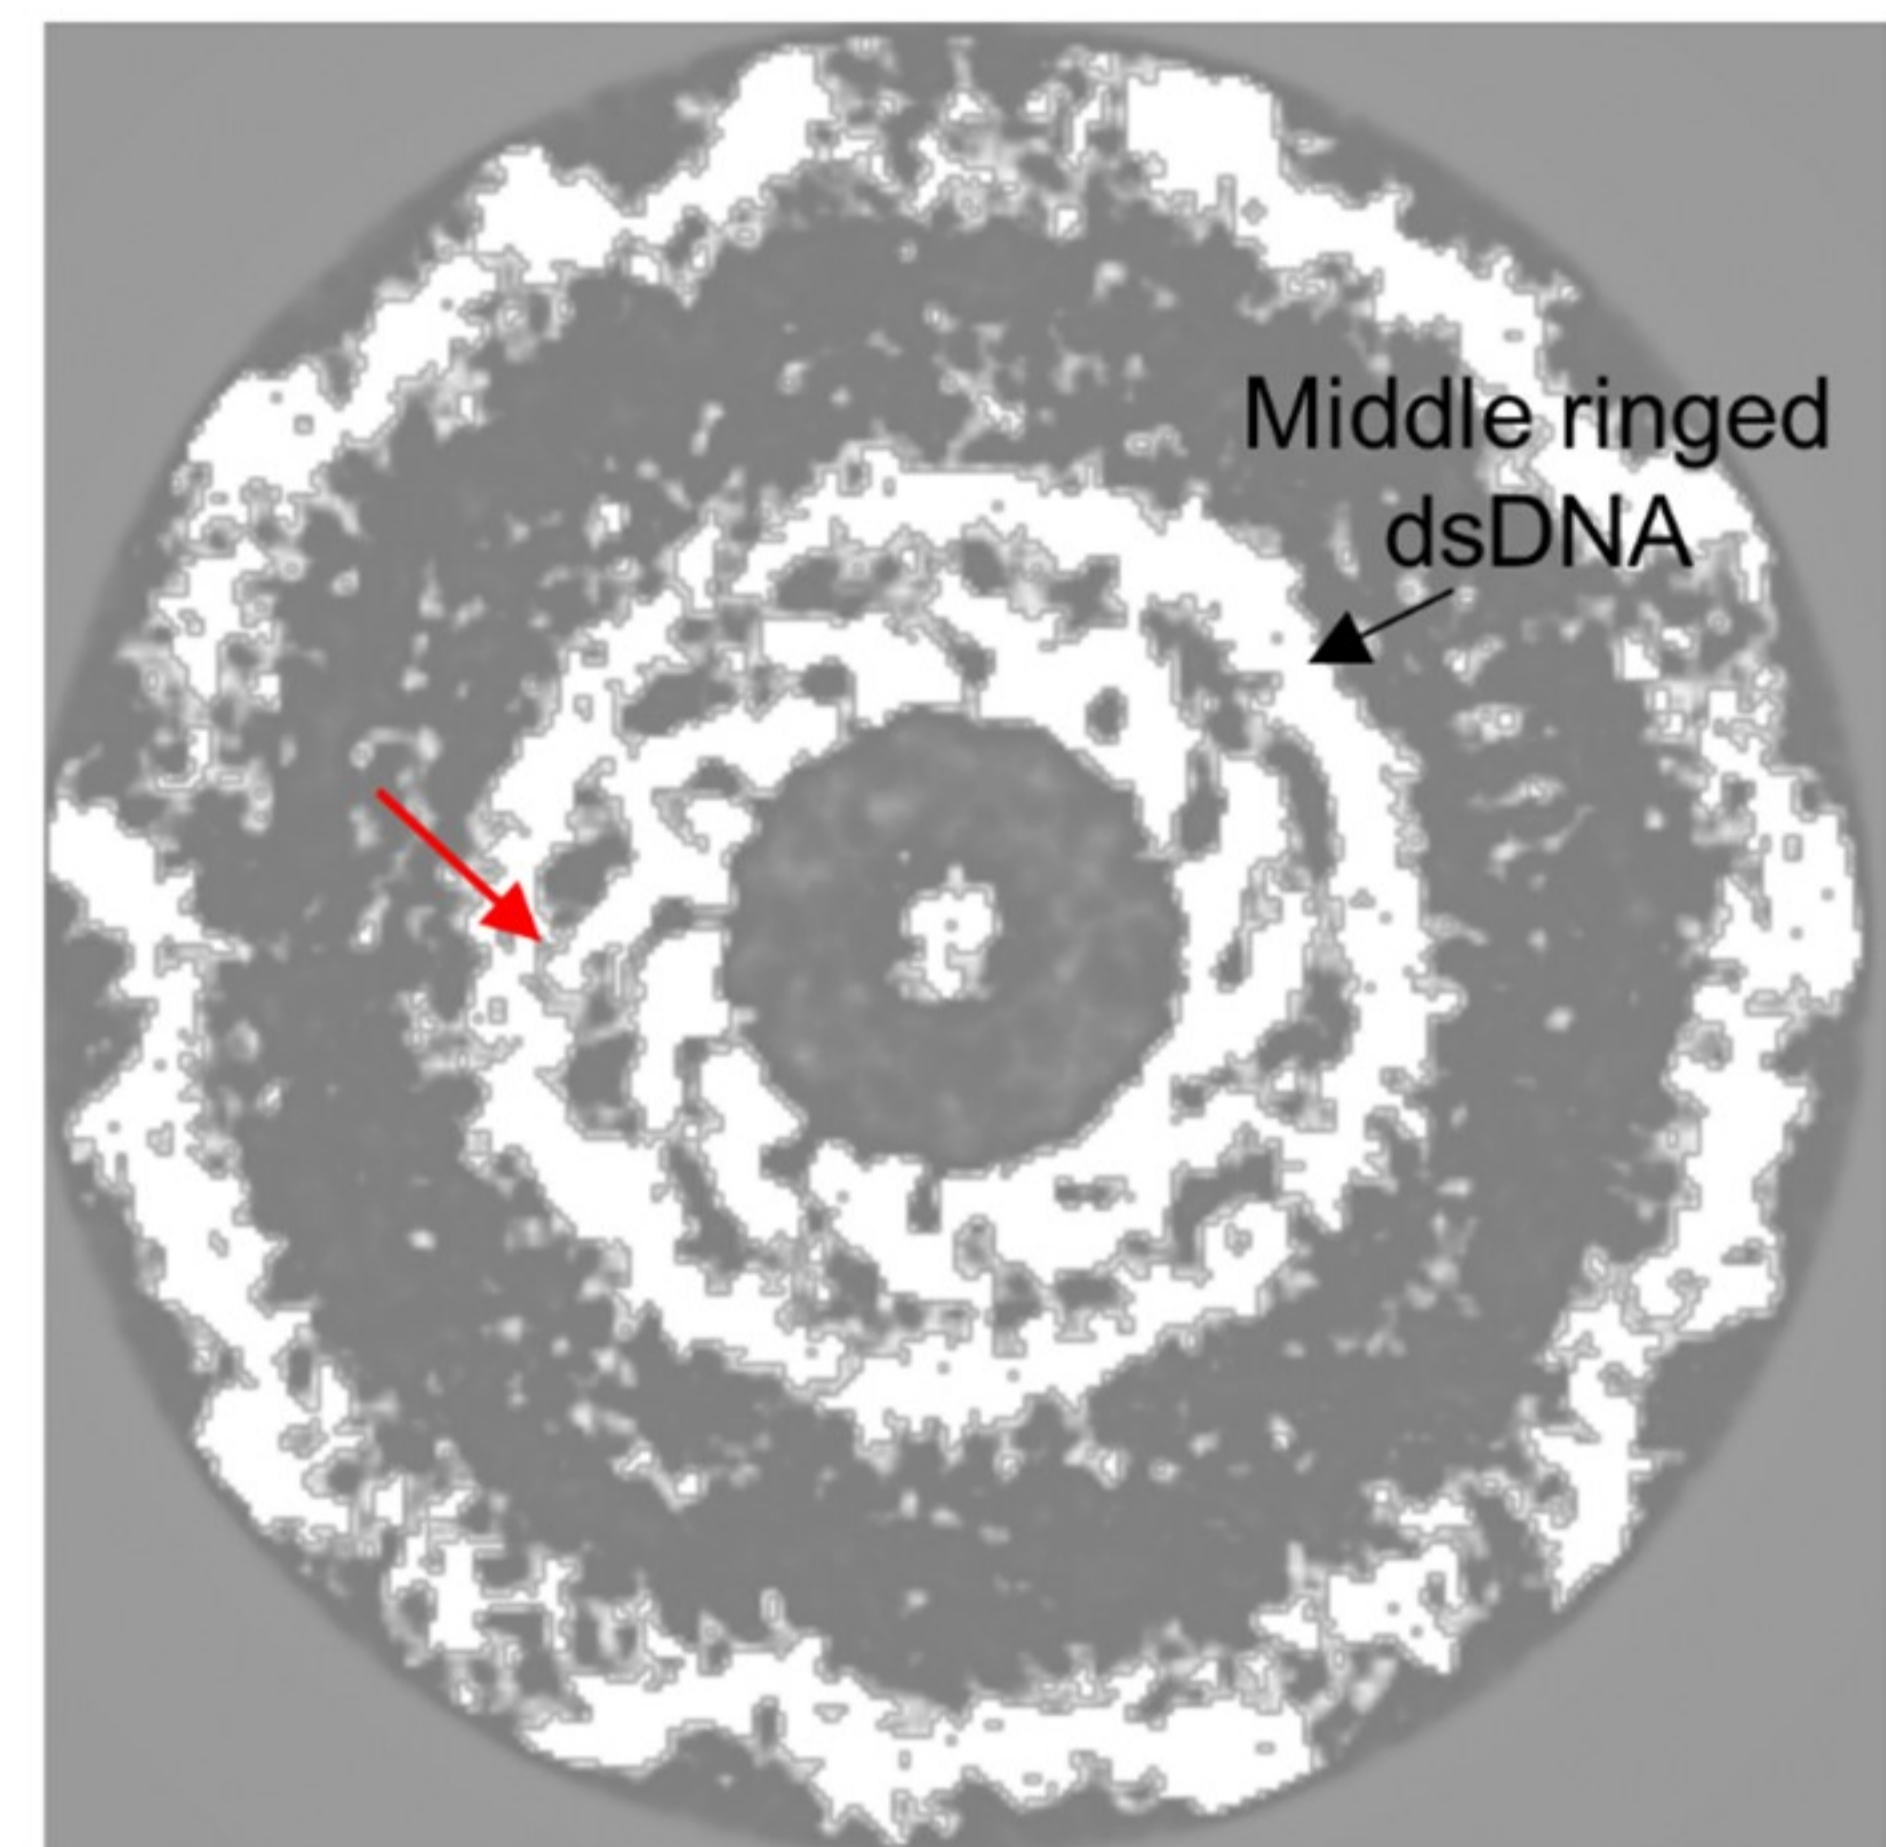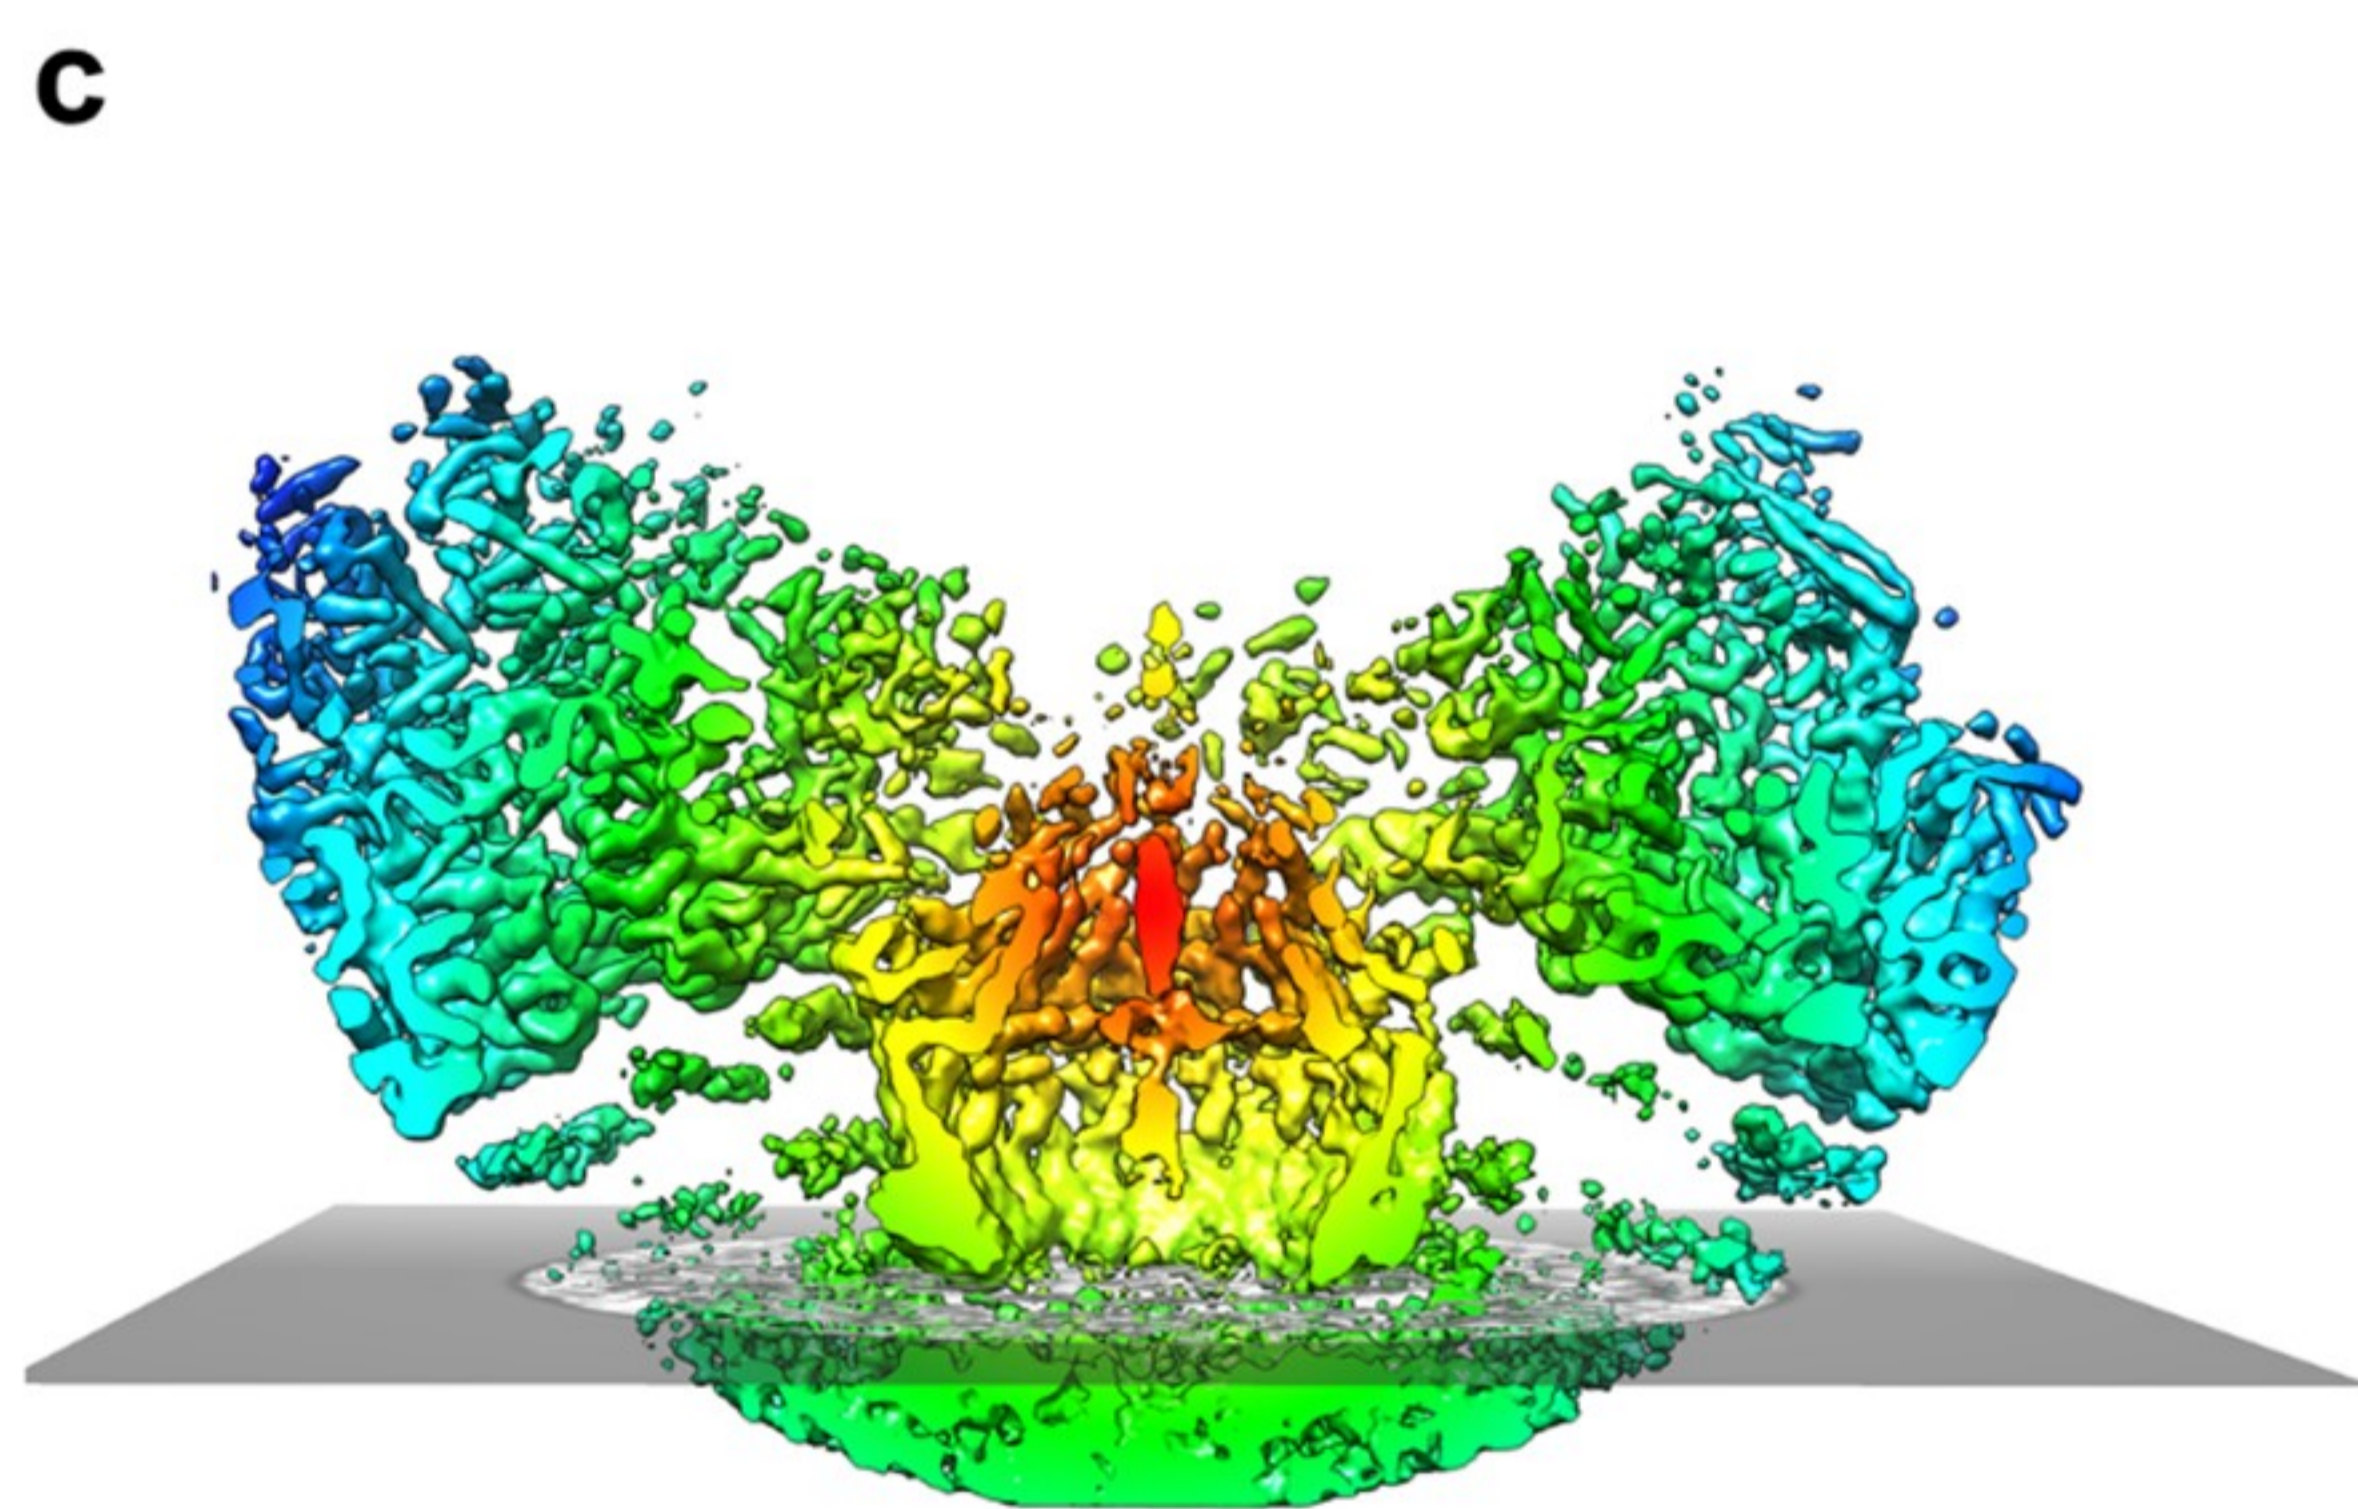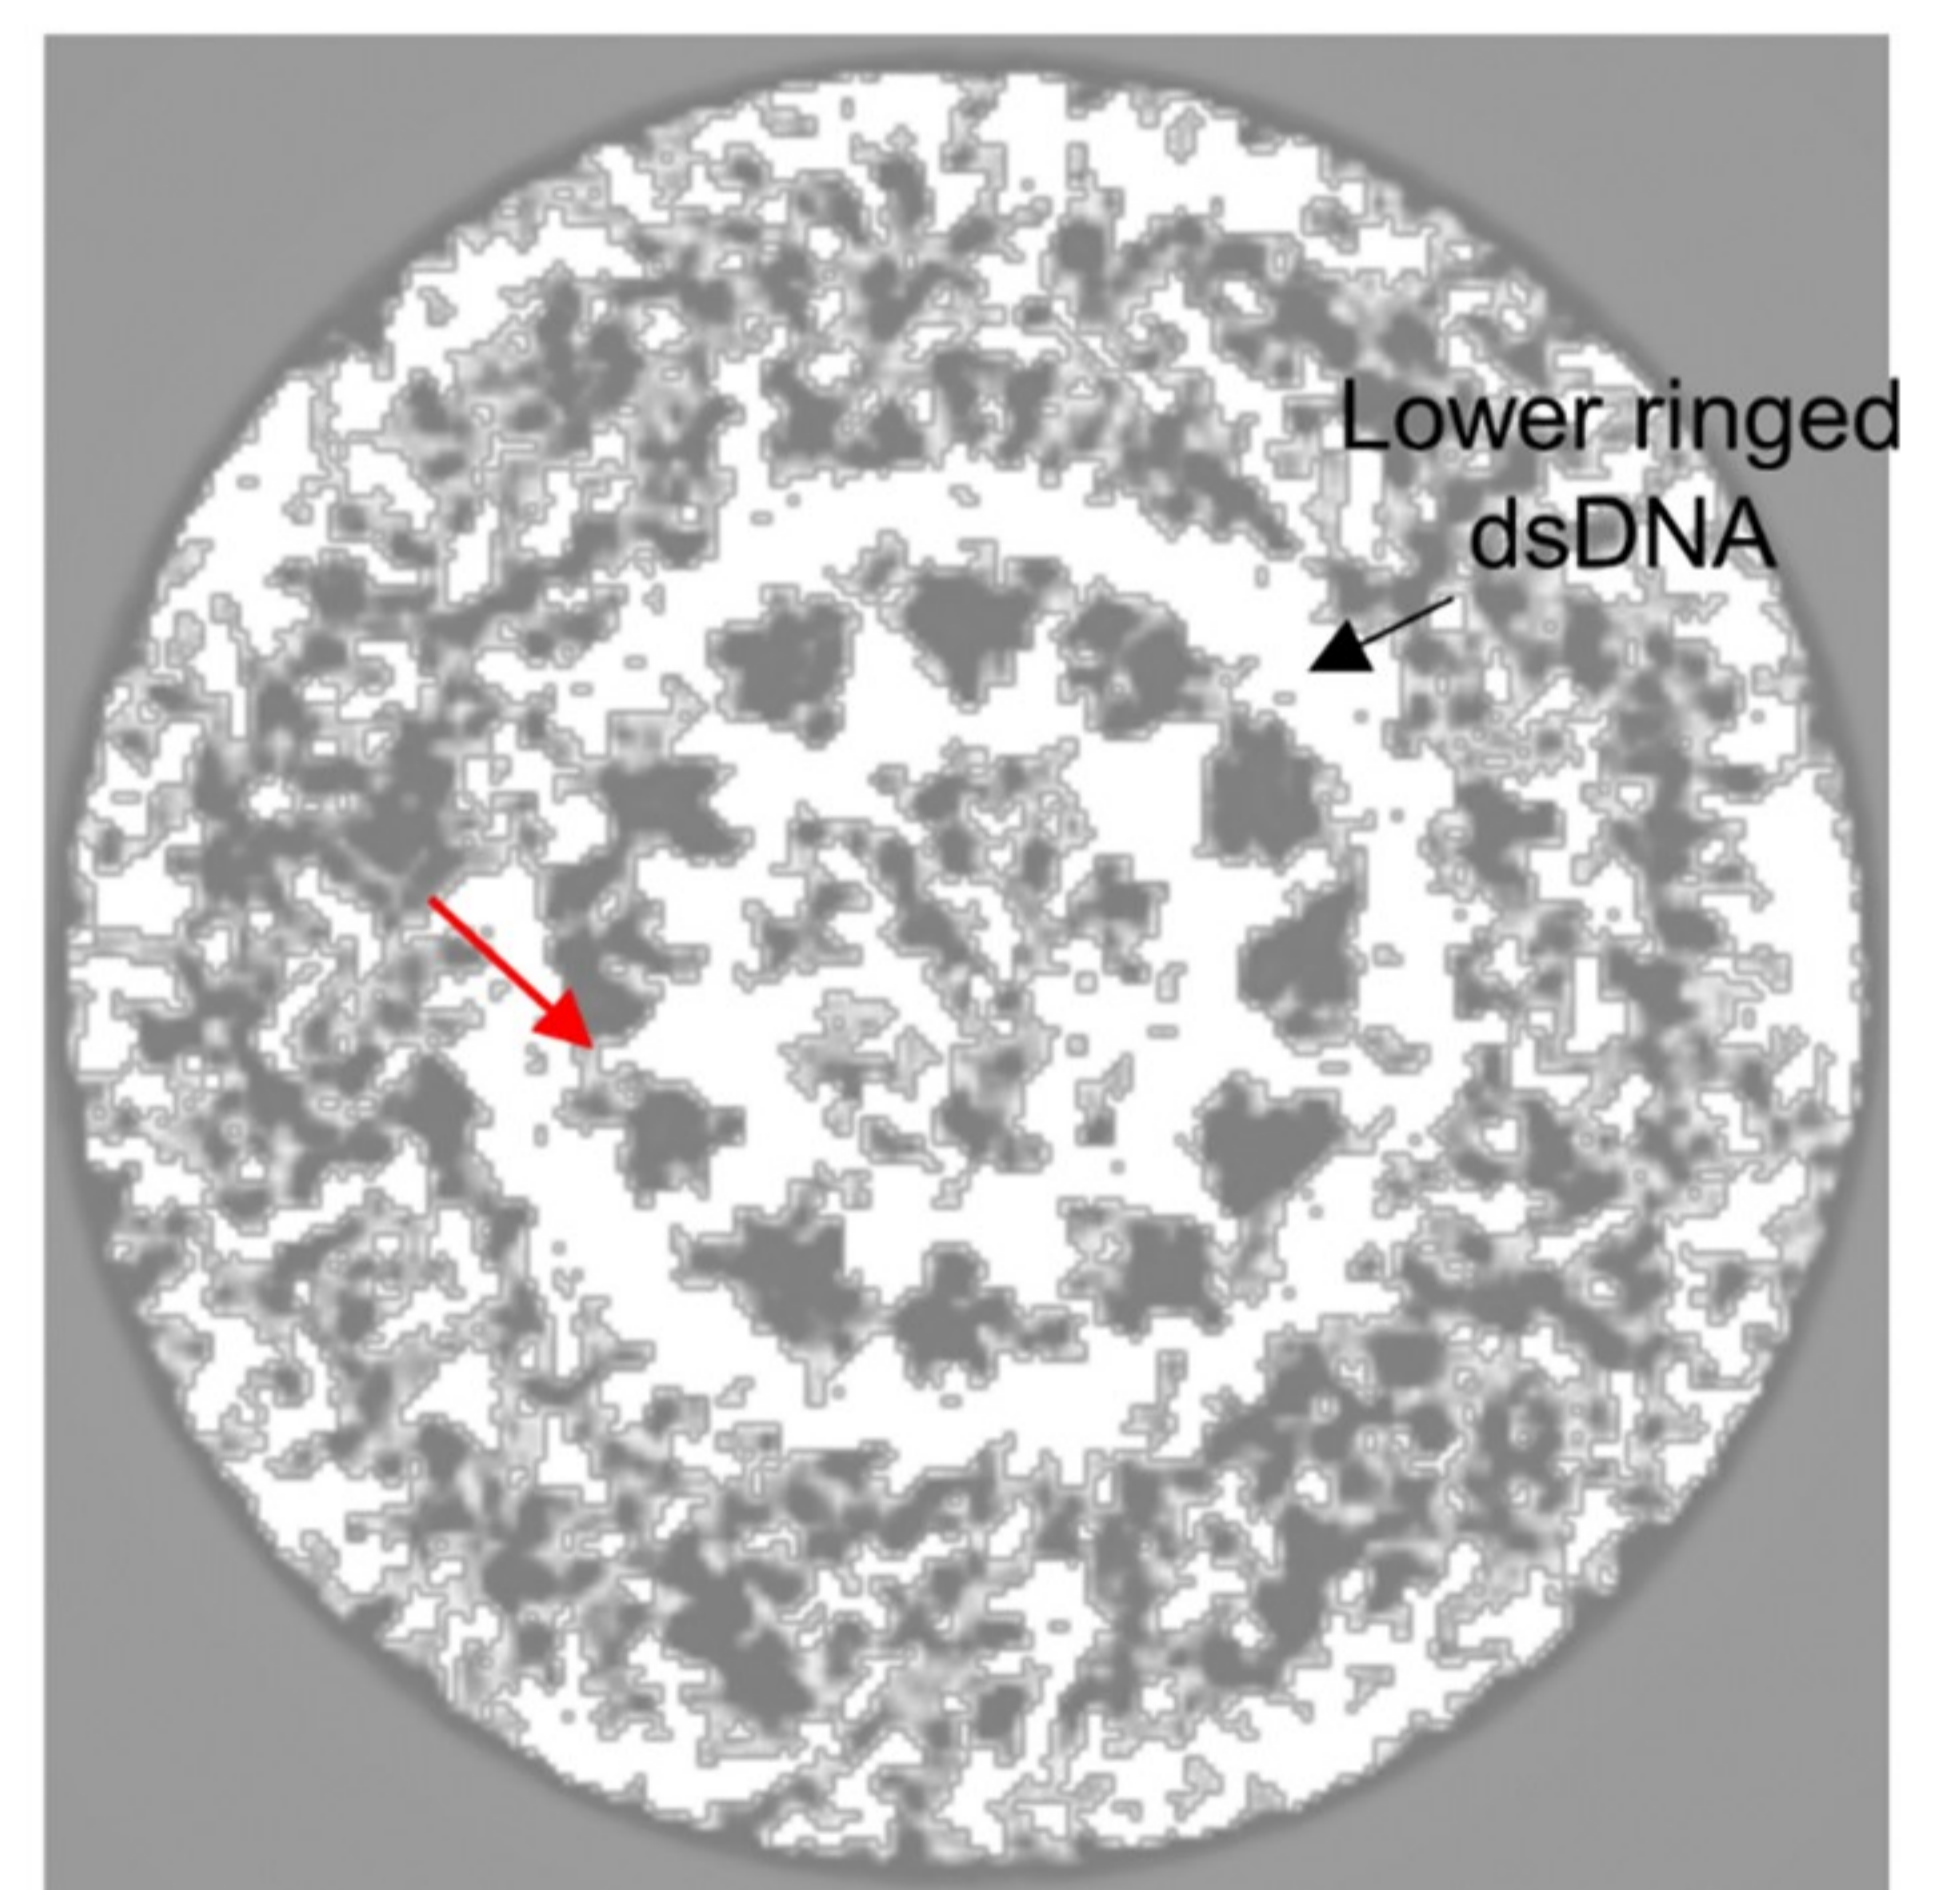

**Supplementary information, Fig. S11 | Interactions between portal and genome DNA.**

The shaded (left) and plane (right) representations of the C1 portal vertex, showing the interactions between the portal and the upper (a), middle (b) and lower (c) ringed DNA, respectively. The plane representations are displayed with grayscale rendering. The red arrows indicate the connections between the portal and genomic dsDNAs.
