# Supplementary material
Source: PubMed Central journal article supplement (PMC7609766)
Supplement: 41422_2020_363_MOESM15_ESM.pdf [file 41422_2020_363_MOESM15_ESM.pdf]

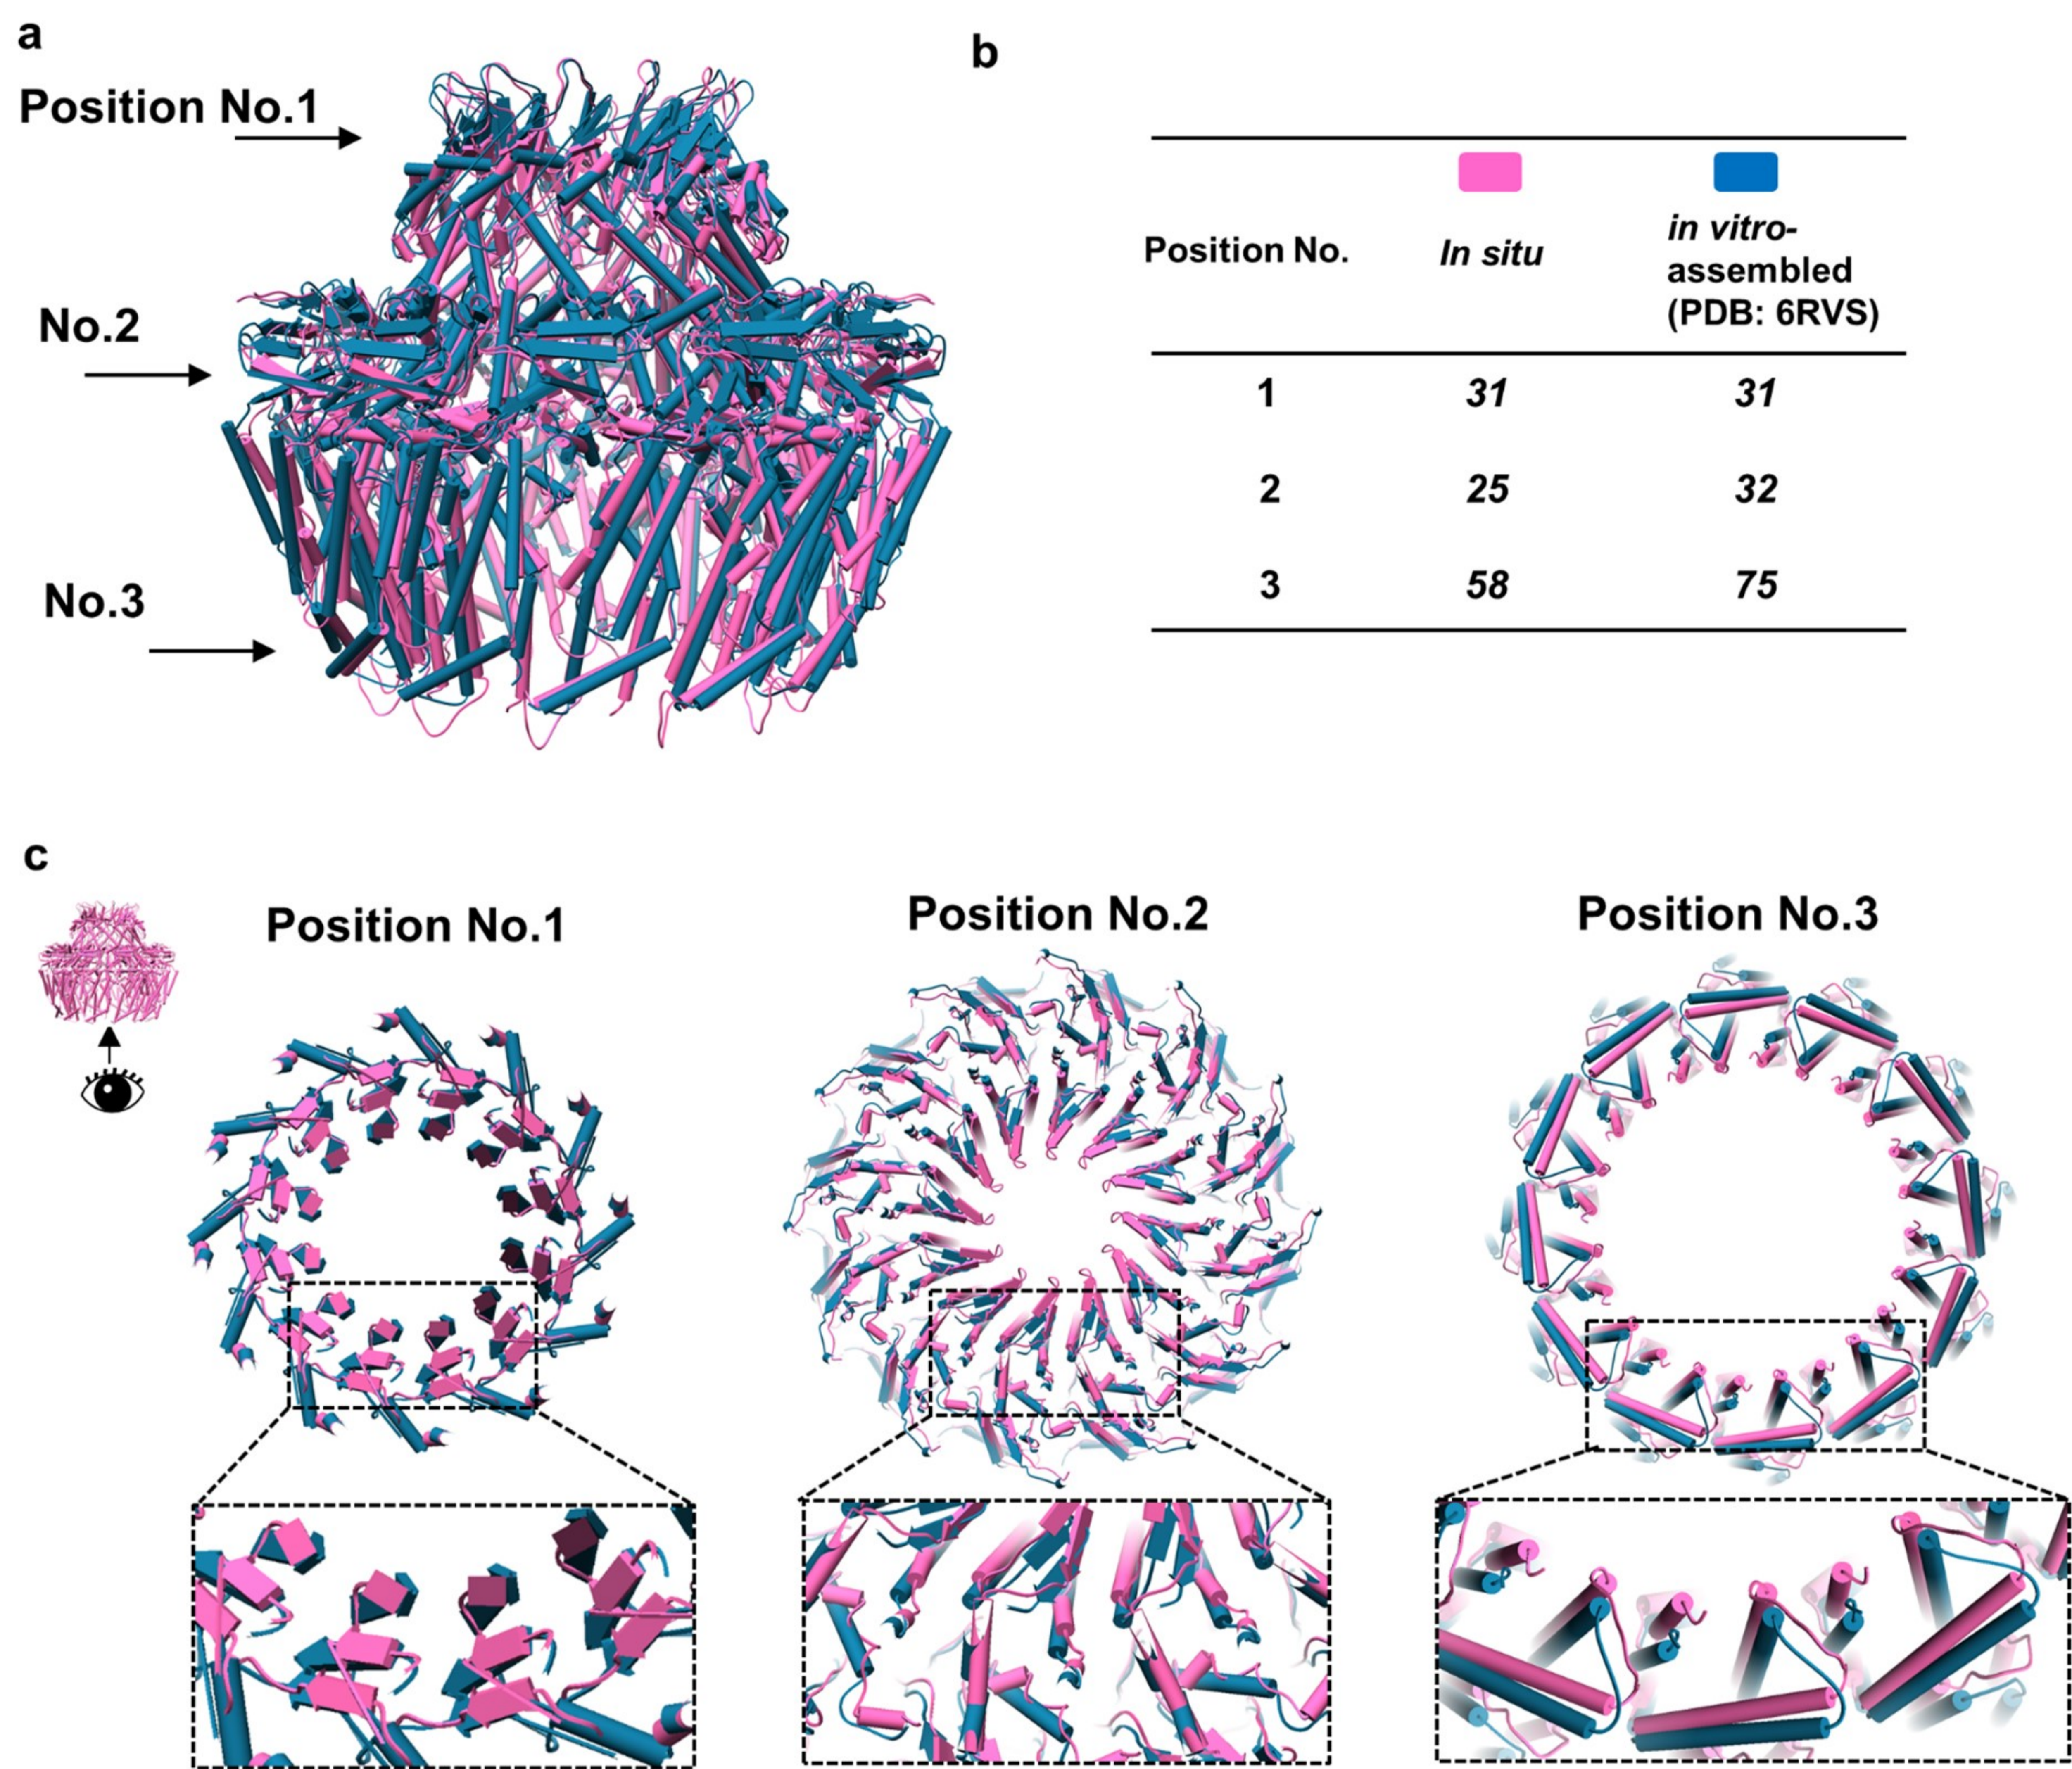

**Supplementary information, Fig. S12| Structural comparison of the *in situ* EBV portal and the *in vitro*-assembled EBV portal.**

**a** Superimposition between the *in situ* (magenta) and the *in vitro*-assembled portals (blue, PDB: 6RVS). The  $\beta$ -tunnel, channel valve and the most constricted region of crown domain are indicated by black arrows.

**b** The interior diameter comparison between the *in situ* and the *in vitro*-assembled portals at the three positions indicated in (a).

**c** Structural comparison between the *in situ* and the *in vitro*-assembled portals.
