# Supplementary material
Source: PubMed Central journal article supplement (PMC7609766)
Supplement: 41422_2020_363_MOESM16_ESM.pdf [file 41422_2020_363_MOESM16_ESM.pdf]

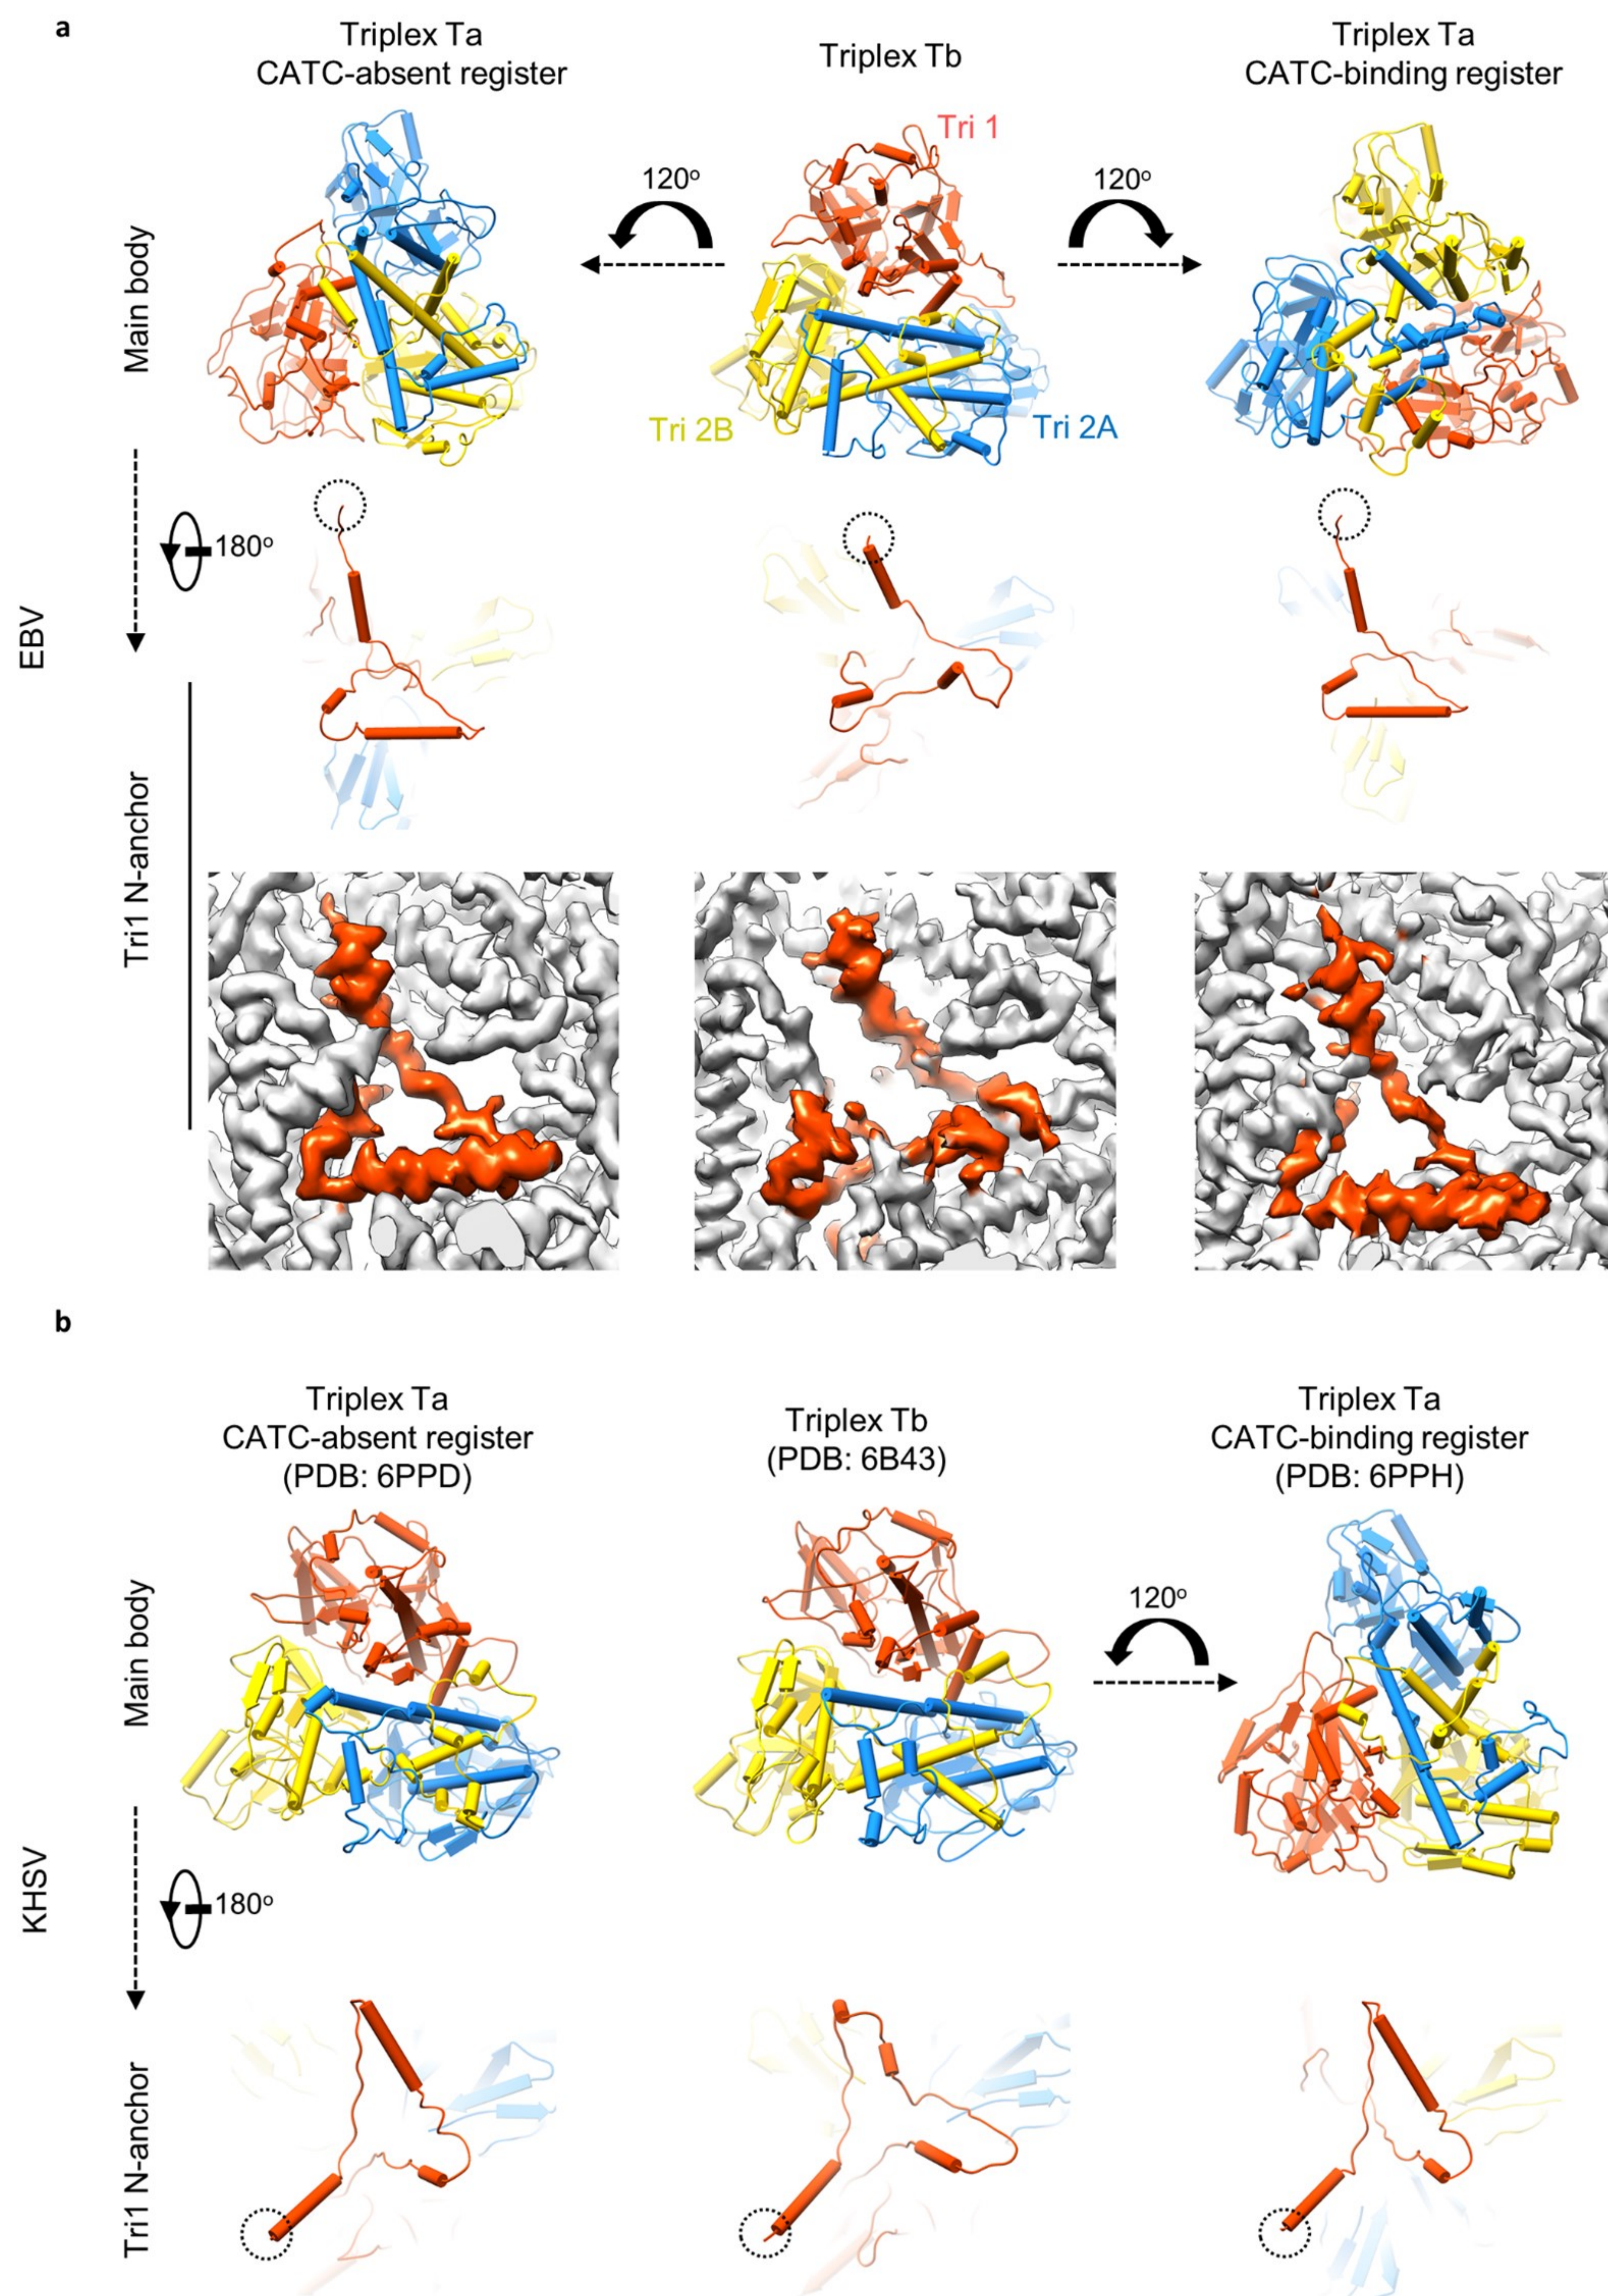

**Supplementary information, Fig. S13| Structural polymorphism of triplexes of EBV and KSHV.**

**a** Atomic models (upper and middle rows) and density maps (lower row) of EBV triplexes, showing the main bodies of both the CATC-absent (left in upper row) and CATC-binding (right in upper row) Ta rotate ~120 degree compared to that of Tb (middle in upper row) in respect to the Tri1 N-anchor (middle and lower rows).

**b** Atomic models of KSHV triplexes, showing the main body of only the CATC-binding (right in upper row) Ta rotate ~120 degree compared to that of Tb (middle in upper row) in respect to the Tri1 N-anchor (lower row). Since the triplexes Tb to Te adopt similar overall structural conformation, Tb is used to illustrate the structural polymorphisms of triplexes.
